# Supplementary material for: Systematic review of physical activity and exercise interventions to improve health, fitness and well-being of children and young people who use wheelchairs
Source: PubMed Central journal article supplement — BMJ Open Sport Exerc Med. 2016 Nov 15;2(1):e000109. doi: 10.1136/bmjsem-2016-000109 (PMC5125427; doi:10.1136/bmjsem-2016-000109), 2016-11-15
Supplement: bmjsem-2016-000109supp_data-extraction-tables.pdf [file bmjsem-2016-000109supp_data-extraction-tables.pdf]

Format of data reporting across studies varied widely.

Under "Control group" and "Intervention group" columns, data are presented for baseline; post-intervention; follow up values (if available), or the change ( $\Delta$ ) between respective time points if actual values are not presented. It should be noted that in some studies samples are different for pre-post and post-follow up comparisons .

Data are presented as group mean  $\pm$  SD or mean (95% CI), unless otherwise stated. P-values for within group changes are indicated when available, or non-significant changes not accompanied by p-value are indicated with NS.

Values not reported are indicated as not available (NA).

“Intervention effectiveness” represents the group x time interaction.

To ensure clarity and consistency, any data reported for mid-intervention or mid-follow up time points are not included.

**FITNESS**

| Study | Intervention type (duration pre-post; post-follow up [when available]) | Subject number (completed) | Outcomes | Intervention group | Control group | Intervention effectiveness |
|-------|------------------------------------------------------------------------|----------------------------|----------|--------------------|---------------|----------------------------|
|-------|------------------------------------------------------------------------|----------------------------|----------|--------------------|---------------|----------------------------|

**RCTs with wheelchair users**

|                       |                                              |             |                             |                                             |                                  |                                                                                       |
|-----------------------|----------------------------------------------|-------------|-----------------------------|---------------------------------------------|----------------------------------|---------------------------------------------------------------------------------------|
| Jansen, et al. (2013) | Cycling: arm and peddle (24 weeks; 24 weeks) | I: 17 C: 13 | 6-min arm cycle test (revs) | 403.0 ± 111.7; 444.4 ± 107.6; 494.8 ± 103.6 | 351.5 ± 110.7; 349.9 ± 131.9; NA | pre-post: Δ (95%CI) = 13.8 (-60.7 - 88.3). p=0.697. post-follow up: Δ= 7.6. P = 0.71  |
|                       |                                              |             | 6-min leg cycle test (revs) | 434.7 ± 164.8; 442.0 ± 124.3; 447.3 ± 91.7  | 405.4 ± 113.2; 415.2 ± 158.3; NA | pre-post: Δ (95%CI) = 5.6 (-56.2 - 67.3). P=0.848. Post-follow up: Δ= -30.7. P = 0.06 |

|                                       |                                                                                                           |               |                                                          |                                                                                     |                                             |                  |
|---------------------------------------|-----------------------------------------------------------------------------------------------------------|---------------|----------------------------------------------------------|-------------------------------------------------------------------------------------|---------------------------------------------|------------------|
| Van Den Berg-Emons, R. J., et al 1998 | Sport/games-based aerobic.(4 times per week participation in the training programme) (9 months; 3 months) | I : 10, C: 10 | Peak aerobic power                                       | 0.91 ± 0.83 ; 1.23 ± 0.80 ; 1.02 ± 0.76. pre-post: p < 0.01; post-follow up: p=0.01 | 1.11 ± 0.96 ; 1.17 ± 0.94 ; 1.15 ± 0.88. NS | Pre-post: p=0.05 |
|                                       |                                                                                                           |               | Anaerobic peak power using pedal or hand bike (W/kg ffm) | 2.16 ± 1.94 ; 2.48 ± 1.94 ; 2.41 ± 1.83. pre-post p=0.06                            | 2.35 ± 1.75 ; 2.60 ± 1.86 ; 2.55 ± 1.89     | NS               |
|                                       | Sport/games-based aerobic. (2 times per week participation in the training programme) (9 months)          | I: 9, C: 9    | Peak aerobic power                                       | 0.97 ± 0.77; 1.16 ± 0.83. pre-post; p < 0.01                                        | 1.11 ± 0.96 ; 1.17 ± 0.94. NS               | p=0.17           |
|                                       |                                                                                                           |               | Anaerobic peak power using pedal or hand bike (W/kg ffm) | 2.32 ± 1.89; 2.67 ± 2.07. pre-post p=0.06                                           | 2.35 ± 1.75 ; 2.60 ± 1.86                   | NS               |

**Non-RCTs with wheelchair users**

|                         |                                                                                 |             |                                       |                                 |                                 |          |
|-------------------------|---------------------------------------------------------------------------------|-------------|---------------------------------------|---------------------------------|---------------------------------|----------|
| Andrade, C., et al 1991 | Complex programme: PRT and cardiovascular exercise, inc psychosocial (10 weeks) | I : 7, C: 5 | 9-min run distance (m)                | 683 ± 330 ; 887 ± 322 p = 0.025 | 844 ± 362 ; 752 ± 171. p = 0.40 | p < 0.10 |
|                         |                                                                                 |             | 9-min run mean heart rate (beats/min) | 152 ± 26 ; 149 ± 18. p < 0.40   | 158 ± 14 ; 160 ± 10. p < 0.40   | p > 0.40 |

|                      |                                                |             |                        |                                      |                                |                                  |
|----------------------|------------------------------------------------|-------------|------------------------|--------------------------------------|--------------------------------|----------------------------------|
| Unnithan, V.B., 2007 | Complex programme (PRT and walking) (12 weeks) | I : 7, C: 6 | VO2 Peak max (L-min-1) | 1.0 ± 0.24; 1.2 ± 0.30. p < 0.05     | 0.93 ± 0.21 ; 0.96 ± 0.20. NS  | p < 0.05                         |
|                      |                                                |             | HR peak max (BPM)      | 146.0 ± 20.4; 149.0 ± 22.5. NS       | 152.0 ± 12.5; 154.0 ± 10.8. NS | NS - no actual p value reported. |
|                      |                                                |             | VE (L-min-1)           | 29.3 ± 6.84 ; 36.6 ± 11.76. p < 0.05 | 29.1 ± 5.08 ; 29.1 ± 4.55. NS  | p < 0.05                         |
|                      |                                                |             | La (mM)                | 4.70 ± 1.7 ; 4.41 ± 1.13. NS         | 5.03 ± 1.98 ; 5.12 ± 1.92. NS  | NS - no actual p value reported. |

**RCT with population with undefined wheelchair use**

|                     |                                |           |                              |                                          |                                            |                     |
|---------------------|--------------------------------|-----------|------------------------------|------------------------------------------|--------------------------------------------|---------------------|
| DeGroot, J.F., 2011 | Walking (treadmill) (12 weeks) | I:18,C:14 | Six minute walk distance (m) | 344.8 ± 125.3, Δ = 38.7 ± 34.6, p < 0.05 | 372.1 ± 116.5, Δ = -2.1 ± 27.8, NS         | p = 0.002, d = 1.08 |
|                     |                                |           | VO2 Peak                     | baseline = 32.3 ± 7.1, Δ = 1.4 ± 3.7, NS | baseline = 33.4 ± 11.0, Δ = -3.0 ± 7.5, NS | p = 0.034, d = 0.78 |

|                   |                                               |            |                      |                                           |                                             |                                                             |
|-------------------|-----------------------------------------------|------------|----------------------|-------------------------------------------|---------------------------------------------|-------------------------------------------------------------|
| Maher, C.A., 2010 | Internet-based education (10 weeks; 10 weeks) | I:20, C:41 | Six minute walk test | 464.3 ± 94.6; 454.7 ± 91.7; 445.3 ± 100.5 | 451.7 ± 107.9; 453.2 ± 108.8; 461.1 ± 108.1 | Pre-Post: p = 0.52 F = 0.4; Pre-follow-up: p = 0.36 F = 1.0 |
|-------------------|-----------------------------------------------|------------|----------------------|-------------------------------------------|---------------------------------------------|-------------------------------------------------------------|

|                       |                                                                             |           |                                      |                                                                                         |                                        |            |
|-----------------------|-----------------------------------------------------------------------------|-----------|--------------------------------------|-----------------------------------------------------------------------------------------|----------------------------------------|------------|
| Katz-Leurer, M., 2009 | Functional exercises at home (6 weeks; 6 weeks for intervention group only) | I:8, C:10 | Energy Expenditure Index (beats/min) | baseline = $5.8 \pm 2.1$ , $\Delta = 0.0 \pm 0.1$ ; $\Delta = 0.0 \pm 0.1$ , $p = 0.77$ | $5.1 \pm 1.3$ , $\Delta = 0.0 \pm 0.1$ | $p = 0.78$ |
|-----------------------|-----------------------------------------------------------------------------|-----------|--------------------------------------|-----------------------------------------------------------------------------------------|----------------------------------------|------------|

|                              |                                 |             |                                                      |                          |                          |             |
|------------------------------|---------------------------------|-------------|------------------------------------------------------|--------------------------|--------------------------|-------------|
| Verschuren, O., et al., 2007 | Functional exercises (8 months) | I: 32 C: 33 | Aerobic Capacity: level on 10m shuttle run test, min | $\Delta = 2.4 \pm 1.9$   | $\Delta = -0.4 \pm 1.6$  | $p < 0.001$ |
|                              |                                 |             | Aerobic Capacity: mean power, W                      | $\Delta = 20.4 \pm 38.0$ | $\Delta = -4.8 \pm 28.2$ | $p = 0.004$ |

**non-RCT with population with undefined wheelchair use**

|                          |                                                                              |           |                      |                                                                                                           |                                                                                                           |                                                                 |
|--------------------------|------------------------------------------------------------------------------|-----------|----------------------|-----------------------------------------------------------------------------------------------------------|-----------------------------------------------------------------------------------------------------------|-----------------------------------------------------------------|
| Crompton, J., et al 2007 | PRT with functional exercises (plus upper body dexterity) (6 weeks; 6 weeks) | I: 6 C: 7 |                      | <b>Lower Limb</b>                                                                                         | <b>Upper Limb</b>                                                                                         |                                                                 |
|                          |                                                                              |           | 10 min walk distance | Median (25th;75th centile): 714 (621;871); 803 (676;836); 680 (602;836). Overall time effect: $p = 0.964$ | Median (25th;75th centile): 677 (569;820); 698 (579;798); 670 (575;749). Overall time effect: $p = 0.401$ | Pre-Post: $p=0.67$ $z=-0.43$ ; Pre-follow-up: $p=0.67$ $z=0.43$ |

|                     |                                                                                                  |            |                                 |                                              |                                      |    |
|---------------------|--------------------------------------------------------------------------------------------------|------------|---------------------------------|----------------------------------------------|--------------------------------------|----|
| Shinohara, T., 2002 | Cycling peddle and arm: at anaerobic threshold. (leg $16.7 \pm 4.7$ , hand $12.7 \pm 6.3$ weeks) | I: 6, C: 5 |                                 | peddle bike                                  | hand bike                            |    |
|                     |                                                                                                  |            | VO2 at the AT Point (ml/kg/min) | $22.0 \pm 5.2$ ; $27.4 \pm 7.1$ , $p < 0.05$ | $12.5 \pm 2.3$ ; $14.0 \pm 1.0$ . NS | NA |
|                     |                                                                                                  |            | Self-assessment of endurance    | 5/6 reported improvement                     | 1/5 reported improvement             | NA |

**BODY COMPOSITION**

| Study                                                    | Intervention type (duration pre-post; post-follow up [when available])                                    | Subject number | Outcomes         | Intervention group                                                         | Control group                                           | Intervention effectiveness                             |
|----------------------------------------------------------|-----------------------------------------------------------------------------------------------------------|----------------|------------------|----------------------------------------------------------------------------|---------------------------------------------------------|--------------------------------------------------------|
| <b>RCTs with wheelchair users</b>                        |                                                                                                           |                |                  |                                                                            |                                                         |                                                        |
| Van Den Berg-Emons, R. J., et al 1998                    | Sport/games-based aerobic.(4 times per week participation in the training programme) (9 months; 3 months) | I : 10, C: 10  | Fat mass (kg)    | baseline = 8.1 ± 6.2, pre-post: NS, post-follow-up: Δ = +0.7 ± 0.7, p<0.05 | baseline = 5.7 ± 2.2, pre-post: Δ = +1.1 ± 1.6, p< 0.05 | pre- mid(2month): p = 0.09, pre-post and follow-up: NS |
|                                                          | Sport/games-based aerobic. (2 times per week participation in the training programme) (9 months)          | I: 9, C: 9     | Fat mass (kg)    | in figure no change                                                        | same control                                            | pre- mid(2month): p < 0.05, pre-post : NS              |
| <b>RCT with population with undefined wheelchair use</b> |                                                                                                           |                |                  |                                                                            |                                                         |                                                        |
| DeGroot, J.F., 2011                                      | Walking (treadmill with body weight support) (12 weeks)                                                   | I:18,C:14      | BMI              | 20.9 ± 5.7, Δ = -0.1 ± 0.9, NS                                             | 20.2 ± 5.1, Δ =-0.3 ± 0.9, NS                           | p = 0.1 d = NA                                         |
|                                                          |                                                                                                           |                | Sum of Skinfolds | 108.1 ± 58.2, Δ = -1.7 ± 17.5, NS                                          | 101.9 ± 56.6, Δ = -2.4 ± 8.2, NS                        | p = 0.9 d = NA                                         |
| Verschuren, O., et al, 2007                              | Functional exercises (8 months)                                                                           | I: 32 C: 33    | BMI              | Δ = 0.7 ± 2.1                                                              | Δ = 0.3 ± 1.1                                           | p = 0.51                                               |

**METABOLISM**

| Study                                 | Intervention type (duration pre-post; post-follow up [when available]) | Subject number | Outcomes | Intervention group           | Control group                | Intervention effectiveness |
|---------------------------------------|------------------------------------------------------------------------|----------------|----------|------------------------------|------------------------------|----------------------------|
| <b>Non-RCTs with wheelchair users</b> |                                                                        |                |          |                              |                              |                            |
| Unnithan, V.B., 2007                  | Complex programme (PRT and walking) (12 weeks)                         | I : 7 , C: 6   | RER      | 1.02 ± 0.11; 1.02 ± 0.10. NS | 1.07 ± 0.13; 1.06 ± 0.12. NS | NS                         |

**RESPIRATORY**

| Study                                    | Intervention type (duration pre-post; post-follow up [when available]) | Subject number | Outcomes               | Intervention group                      | Control group                         | Intervention effectiveness |
|------------------------------------------|------------------------------------------------------------------------|----------------|------------------------|-----------------------------------------|---------------------------------------|----------------------------|
| <b>RCT with undefined wheelchair use</b> |                                                                        |                |                        |                                         |                                       |                            |
| Choi, J.A. et al. (2016)                 | spirometer exercise with vs without additional therapy (4 weeks; -)    | I:25 C:23      | FEV1 (l)               | 1.40 ± 0.37; 1.57 ± 0.44. p=0.005       | 1.35 ± 0.44; 1.35 ± 0.45. p=0.848     | p = 0.017                  |
|                                          |                                                                        |                | FVC (l)                | 1.95 ± 0.48; 2.15 ± 0.56. p<0.01        | 1.94 ± 0.66; 1.90 ± 0.69. p=0.511     | p = 0.005                  |
|                                          |                                                                        |                | FEV1/FVC (l)           | 72.76 ± 11.91; 74.48 ± 13.98. p=0.443   | 71.71 ± 17.23; 73.79 ± 15.68. p=0.563 | p = 0.821                  |
|                                          |                                                                        |                | Peak flow (l/min)      | 191.60 ± 56.25; 217.60 ± 67.58. p=0.003 | 71.71 ± 17.23; 73.79 ± 15.68. p=0.563 | p = 0.085                  |
|                                          |                                                                        |                | maximal phonation time | 10.16 ± 3.70; 12.13 ± 3.61. p=0.001     | 9.65 ± 5.30; 10.06 ± 5.75. p=0.705    | p = 0.008                  |

**QOL**

| Study | Intervention type (duration pre-post; post-follow up [when available]) | Subject number | Outcomes | Intervention group | Control group | Intervention effectiveness |
|-------|------------------------------------------------------------------------|----------------|----------|--------------------|---------------|----------------------------|
|-------|------------------------------------------------------------------------|----------------|----------|--------------------|---------------|----------------------------|

**RCTs with wheelchair users**

|                       |                                              |             |                |                              |                              |                                                   |
|-----------------------|----------------------------------------------|-------------|----------------|------------------------------|------------------------------|---------------------------------------------------|
| Jansen, et al. (2013) | Cycling: arm and peddle (24 weeks; 24 weeks) | I: 17 C: 13 | PEDI self care | 74.8 ± 13.2; 77.1 ± 14.1; NA | 72.3 ± 13.6; 72.9 ± 12.8; NA | Pre-post: Δ (95%CI) = 4.1 (-2.2 - 10.4). P=0.192. |
|                       |                                              |             | PEDI mobility  | 57.6 ± 15.0; 55.8 ± 13.0; NA | 62.7 ± 11.0; 57.7 ± 15.2; NA | Pre-post: Δ (95%CI) = 1.6 (-3.6 - 6.0). P=0.523.  |

|                           |                                                                           |             |                                              |                                       |                                       |                                                                                                   |
|---------------------------|---------------------------------------------------------------------------|-------------|----------------------------------------------|---------------------------------------|---------------------------------------|---------------------------------------------------------------------------------------------------|
| Van Wely, et al. (2014) a | Complex: Life-style counselling and fitness training (6 months; 6 months) | I: 23 C: 23 | CAPE Active physical                         | 1.16 ± 0.47; 1.40 ± 0.32; 1.25 ± 0.61 | 1.15 ± 0.71; 1.41 ± 0.52; 1.27 ± 0.68 | Δ (95%CI). pre-post: -0.01 (-0.23 - 0.22) P = 0.95. pre-follow up: -0.05 (-0.40 to 0.30) P = 0.78 |
|                           |                                                                           |             | CAPE Social activities                       | 2.92 ± 0.81; 3.00 ± 0.79; 2.95 ± 0.95 | 3.05 ± 0.72; 3.37 ± 0.79; 3.30 ± 0.71 | Δ (95%CI). pre-post: -0.23 (-0.75 - 0.12) P = 0.28. pre-follow up: -0.17 (-0.59 - 0.26) P = 0.43  |
|                           |                                                                           |             | CAPE Skill-based                             | 1.18 ± 0.52; 1.03 ± 0.68; 0.95 ± 0.46 | 0.97 ± 0.56; 0.90 ± 0.66; 0.94 ± 0.64 | Δ (95%CI). pre-post: -0.04 (-0.39 - 0.31) P = 0.83. pre-follow up: -0.23 (-0.49 - 0.03) P = 0.08  |
|                           |                                                                           |             | Life-H                                       | 7.90 ± 1.88; 8.15 ± 1.68; 8.70 ± 1.19 | 8.76 ± 1.16; 8.33 ± 1.56; 8.23 ± 1.43 | Δ (95%CI). pre-post: 0.38 (-0.67 - 1.43) P = 0.47. pre-followup: 0.92 (0.10 - 1.74) P = 0.03      |
|                           |                                                                           |             | Self-perception: Athletic                    | 2.85 ± 0.46; 2.84 ± 0.54; 2.87 ± 0.48 | 3.03 ± 0.51; 2.90 ± 0.59; 2.87 ± 0.54 | Δ (95%CI). pre-post: 0.07 (-0.20 - 0.35) P = 0.59. pre-follow up: 0.08 (-0.20 - 0.35) P = 0.57    |
|                           |                                                                           |             | Self-perception: Motor                       | 3.14 ± 0.51; 3.03 ± 0.51; 3.15 ± 0.40 | 3.18 ± 0.42; 3.14 ± 0.55; 3.14 ± 0.47 | Δ (95%CI). pre-post: -0.07 (-0.31 - 0.16) P = 0.53. pre-follow up: 0.01 (-0.23 - 0.24) p =0.94    |
|                           |                                                                           |             | Self-perception: self-worth                  | 3.41 ± 0.40; 3.42 ± 0.43; 3.53 ± 0.43 | 3.39 ± 0.51; 3.34 ± 0.64; 3.46 ± 0.53 | Δ (95%CI). pre-post: 0.07 (-0.22 - 0.36) P = 0.63. pre-follow up: 0.03 (-0.23 - 0.30) P = 0.80    |
|                           |                                                                           |             | CP-QOL: Social well-being                    | 75.9 ± 8.4; NA; 76.5 ± 7.2            | 75.4 ± 11.9; NA; 79.4 ± 10.5          | Δ (95%CI). pre-follow up: -3.1 (-7.9 - 1.7) P = 0.19                                              |
|                           |                                                                           |             | CP-QOL: Functioning                          | 71.1 ± 8.6; NA; 72.9 ± 9.6            | 71.3 ± 11.4; NA; 75.5 ± 9.4           | Δ (95%CI). pre-follow up: -2.5 (-7.3 - 2.3) P = 0.30                                              |
|                           |                                                                           |             | CP-QOL: Participation and physical health    | 65.5 ± 11.6; NA; 68.9 ± 9.3           | 67.2 ± 16.5; NA; 70.7 ± 14.0          | Δ (95%CI) pre-followup: -0.8 (-5.7 to 4.1) P = 0.75                                               |
|                           |                                                                           |             | CP-QOL: Emotional well-being and self-esteem | 77.7 ± 8.2; NA; 78.2 ± 7.1            | 79.7 ± 15.1; NA; 79.6 ± 12.7          | Δ (95%CI). pre-follow up: -0.3 (-5.3 - 4.7) P = 0.90                                              |
|                           |                                                                           |             | CP-QOL: Pain and impact of the disability    | 30.5 ± 16.8; NA; 34.4 ± 16.4          | 32.9 ± 21.0; NA; 28.4 ± 14.8          | Δ (95%CI). pre-follow up: 5.0 (-5.2 - 15.2) P = 0.33                                              |

**Non-RCTs with wheelchair users**

|                         |                                                                                 |            |                   |                                 |                          |        |
|-------------------------|---------------------------------------------------------------------------------|------------|-------------------|---------------------------------|--------------------------|--------|
| Andrade, C., et al 1991 | Complex programme: PRT and cardiovascular exercise, inc psychosocial (10 weeks) | I: 7, C: 5 | Global self-worth | 3.3 ± 0.3; 3.6 ± 0.3. p = 0.025 | 3.6 ± 0.4; 3.1 ± 0.3. NS | p<0.01 |
|-------------------------|---------------------------------------------------------------------------------|------------|-------------------|---------------------------------|--------------------------|--------|

|  |                                                              |                           |                                                                                        |                                       |                                                |                             |
|--|--------------------------------------------------------------|---------------------------|----------------------------------------------------------------------------------------|---------------------------------------|------------------------------------------------|-----------------------------|
|  | Functional exercises (Intensive Lemo vs Move&Walk) (4 weeks) | Lemo:22, Move and Walk:30 | Mobility from PEDI FS (Pediatric Evaluation of Disability Inventory-Functional Skills) | <b>Lemo:</b> 50.1 ± 21.8; 50.9 ± 22.9 | <b>Move&amp;Walk:</b> 37.1 ± 21.8; 38.3 ± 21.2 | both NS and interaction NS. |
|--|--------------------------------------------------------------|---------------------------|----------------------------------------------------------------------------------------|---------------------------------------|------------------------------------------------|-----------------------------|

|                  |                                                                                                      |    |                                                                                        |                                       |                                           |
|------------------|------------------------------------------------------------------------------------------------------|----|----------------------------------------------------------------------------------------|---------------------------------------|-------------------------------------------|
| Odman , P., 2005 | Functional exercises (combined Lemo + Move&Walk) (4 weeks intensive; 1 year voluntary participation) | 52 | Mobility from PEDI FS (Pediatric Evaluation of Disability Inventory-Functional Skills) | 42.7 + 22.5; 43.6 + 22.6; 43.6 + 22.8 | pre-4 weeks: p = 0.03, 4 weeks-1 year: NS |
|------------------|------------------------------------------------------------------------------------------------------|----|----------------------------------------------------------------------------------------|---------------------------------------|-------------------------------------------|

**RCT with population with undefined wheelchair use**

|                     |                                                         |           |                           |                                               |                                       |                 |
|---------------------|---------------------------------------------------------|-----------|---------------------------|-----------------------------------------------|---------------------------------------|-----------------|
| DeGroot, J.F., 2011 | Walking (treadmill with body weight support) (12 weeks) | I:18,C:14 | Total Fatigue PEDS QL (%) | baseline = 70.5 ± 16.4, Δ = 7.8 ± 9.8, p<0.05 | 74.2 ± 16.2, change = -0.4 ± 9.9 , NS | p = 0.06 d = NA |
|---------------------|---------------------------------------------------------|-----------|---------------------------|-----------------------------------------------|---------------------------------------|-----------------|

|                    |                                                                                          |             |                                                                                                       |                                               |                                                            |                                |
|--------------------|------------------------------------------------------------------------------------------|-------------|-------------------------------------------------------------------------------------------------------|-----------------------------------------------|------------------------------------------------------------|--------------------------------|
| Demuth, S.K., 2012 | Cycling / complex: strengthening and cardiorespiratory phases in each session (3 months) | I: 28, C:29 | QoL (PedsQL): Physical functioning                                                                    | 67.2 (57.2–77.3); 70.4 (61.9–79.0). p = 0.21  | 65.9 (58.2–73.5); 69.9 (63.7–76.2) , p = 0.3               | Δ = -0.8 (-10.0–8.3), p = 0.85 |
|                    |                                                                                          |             | QoL (PedsQL): Psychosocial Health Summary                                                             | 62.8 (53.8-71.8); 69.7 (61.8-77.6). p = 0.008 | 68.0 (61.8-74.2) ; 69.5 (63.5-75.5). p = 0.40              | Δ = 5.4 (-0.5-11.5), p = 0.07  |
|                    |                                                                                          |             | QoL (PedsQL): Total Score                                                                             | 64.2 (55.6-72.8); 70.0 (62.3-77.6), p = 0.006 | 67.3 (62.0 - 76.6), p = 0.22; 69.6 (64.1 - 75.2), p = 0.22 | Δ = 3.5 (-2.0-8.8), p = 0.21   |
|                    |                                                                                          |             | Paediatric Outcomes Data Collection Instrument (PODCI) parent responses: Global function and symptoms | 74.8 (70.3-79.4); 75.2 (70.4-80.1), p = 0.78  | 75.1 (70.4-79.9); 75.4 (70.9-79.9), p = 0.86               | Δ = 0.1 (-4.1-4.3), p = 0.96   |
|                    |                                                                                          |             | Paediatric Outcomes Data Collection Instrument (PODCI) parent responses: Happiness                    | 82.9 (78.0-87.8); 86.1 (80.9-91.3) p = 0.25   | 76.7 (69.4-84.1); 77.4 (71.9-82.9), p = 0.80               | Δ = 2.5 (-5.1-10.2), p = 0.51  |
|                    |                                                                                          |             | Paediatric Outcomes Data Collection Instrument (PODCI) parent responses: Satisfaction with symptoms   | 50.0 (36.3-63.7); 51.9 (39.6-64.1), p = 0.77  | 44.8 (32.5-57.1); 32.8 (21.9-43.6) , p = 0.046             | Δ =13.9 (-3.3-31.2), p = 0.11  |
|                    |                                                                                          |             | Paediatric Outcomes Data Collection Instrument (PODCI) parent responses: Treatment expectations       | 64.2 (56.4-72.0); 62.5 (53.2-71.7), p = 0.68  | 61.8 (55.3-68.3); 42.4 (33.8-51.5), p = 0.0002             | Δ = 17.7 (5.2-30.0), p = 0.006 |

|                                                                    |                                                                       |                                    |                                                                        |                                    |                                                                                  |                                                                                                 |
|--------------------------------------------------------------------|-----------------------------------------------------------------------|------------------------------------|------------------------------------------------------------------------|------------------------------------|----------------------------------------------------------------------------------|-------------------------------------------------------------------------------------------------|
| Gates, P.E; 2012                                                   | PRT vs walking-partial body weight support (home) (12 weeks; 4 weeks) | I: 11 C: 12                        |                                                                        | Supported Walking                  | PRT                                                                              |                                                                                                 |
|                                                                    |                                                                       |                                    | PedsQLCP (child)                                                       | 69.2 ± 13; 71.6 ± 17; 69.3 ± 18    | 68.4 ± 15; 62.1 ± 18; 70.3 ± 16. pre-post and pre-follow-up: p = 0.01            | p = 0.016                                                                                       |
|                                                                    |                                                                       |                                    | The Piers-Harris Self-Concept scale                                    | 45.3 ± 9; 48.1 ± 8; 46.8 ± 10. NS  | 42.7 ±7; 44.6 ± 8; 47.6 ± 7. NS                                                  | p = 0.14                                                                                        |
|                                                                    |                                                                       |                                    | Canadian Occupational Performance Measure (COPM) - Performance         | 4.46 ± 2.2; 5.17 ± 2.2; 5.99 ± 2.7 | 3.16 ± 1.8; 4.10 ± 2.2; 4.51 ± 2.7                                               | p = 0.95. Combined main effect of time p = 0.003; pre-post: p = 0.008; pre-follow-up: p = 0.01  |
|                                                                    |                                                                       |                                    | Canadian Occupational Performance Measure (COPM) - Satisfaction        | 4.38 ± 2.7; 5.37 ± 2.5; 6.36 ± 2.7 | 3.49 ±1.5; 4.58 ±1.6; 4.96 ± 2.5                                                 | p = 0.75. Combined main effect of time p = 0.0008; pre-post: p = 0.015; pre-follow-up p = 0.001 |
|                                                                    |                                                                       |                                    | Children's Assessment of Participation and Enjoyment (CAPE): Diversity | 26.6 ± 5.3; 25.2 ± 9.5; 24.6 ± 9.3 | 24.9 ±6.3; 18.6 ± 5.4; 19.4 ± 4.0                                                | NS                                                                                              |
|                                                                    |                                                                       |                                    | Children's Assessment of Participation and Enjoyment (CAPE): Intensity | 2.12 ± 0.5; 2.16 ± 1.0; 2.39 ± 1.1 | 2.14 ± 0.5; 1.68 ± 0.6; 1.80 ± 0.5. pre-post: p = 0.01, pre-follow-up: p = 0.01. | p = 0.05                                                                                        |
|                                                                    |                                                                       |                                    | Children's Assessment of Participation and Enjoyment (CAPE): With Whom | 2.47 ± 0.5; 2.41 ± 0.5; 2.35 ± 0.4 | 2.10 ± 0.3; 1.93 ± 0.4; 2.17 ± 0.5. post-follow-up: p = 0.02                     | p = 0.04                                                                                        |
| Children's Assessment of Participation and Enjoyment (CAPE): Where | 2.63 ± 0.6; 2.46 ± 0.5; 2.59 ± 0.4                                    | 2.03 ± 0.4; 2.18 ± 0.3; 2.14 ± 0.4 | NS                                                                     |                                    |                                                                                  |                                                                                                 |



|                                                                       |                                                   |                |                                                                        |                                               |                                               |                                                                                                                                                      |
|-----------------------------------------------------------------------|---------------------------------------------------|----------------|------------------------------------------------------------------------|-----------------------------------------------|-----------------------------------------------|------------------------------------------------------------------------------------------------------------------------------------------------------|
|                                                                       |                                                   |                | Children's Assessment of Participation and Enjoyment (CAPE): Enjoyment | 4.18 ± 0.5; 4.30 ± 0.5; 4.47 ± 0.4            | 4.03 ± 0.4; 4.36 ± 0.5; 4.49 ± 0.5            | NS                                                                                                                                                   |
| Scholtes, V. A; 2012                                                  | PRT with functional exercises (12 weeks; 6 weeks) | I: 24<br>C: 23 | CAPE                                                                   | 44.65 ± 18.30; 39.04 ± 13.28; 32.20 ± 9.27    | 36.63 ± 13.08; 31.14 ± 13.60; 31.83 ± 11.78   | pre-post: p=0.86 Regression coefficient (95% CI) = -0.87 (-10.45-8.71); pre-follow-up: p=0.12 Regression coefficient (95% CI) = -7.34 (-16.50-1.89)  |
|                                                                       |                                                   |                | MobQues-28 (0-100)                                                     | 68.42 ± 20.93; 67.51 ± 24.58; 70.03 ± 23.49   | 64.77 ± 26.26; 66.43 ± 25.93; 67.49 ± 20.33   | Pre-Post: p = 0.87 Regression coefficient (95% CI) = -0.46 (-6.0-5.07); pre-follow-up: p = 0.44 Regression coefficient (95% CI) = -2.22 (-7.88-3.43) |
| Verschuren, O., et al., 2007                                          | Functional exercises (8 months)                   | I: 32<br>C: 33 | Self-concept (SPPC) - Athletic competence                              | Δ = 2.0 ± 4.2                                 | Δ = -1.3 ± 3.7                                | p = 0.005                                                                                                                                            |
|                                                                       |                                                   |                | Self-concept (SPPC) - Physical appearance                              | Δ = 0.03 ± 0.2                                | Δ = 0.2 ± 4.4                                 | p = 0.90                                                                                                                                             |
|                                                                       |                                                   |                | Self-concept (SPPC) - Global perception of worth                       | Δ = 0.5 ± 3.3                                 | Δ = -1.0 ± 4.0                                | p = 0.20                                                                                                                                             |
|                                                                       |                                                   |                | Participation (CAPE) - Overall activities                              | Δ = 0.0 ± 0.5                                 | Δ = -4.0 ± 0.6                                | p = 0.002                                                                                                                                            |
|                                                                       |                                                   |                | Participation (CAPE) - Formal activities                               | Δ = 0.2 ± 0.4                                 | Δ = -4.0 ± 0.8                                | p = <0.001                                                                                                                                           |
|                                                                       |                                                   |                | Participation (CAPE) - Informal activities                             | Δ = 0.0 ± 0.7                                 | Δ = -0.4 ± 0.7                                | p = 0.07                                                                                                                                             |
|                                                                       |                                                   |                | Participation (CAPE) - Recreational activities                         | Δ = 0.2 ± 1.0                                 | Δ = -0.4 ± 1.1                                | p = 0.69                                                                                                                                             |
|                                                                       |                                                   |                | Participation (CAPE) - Social activities                               | Δ = -0.1 ± 0.8                                | Δ = -0.4 ± 1.1                                | p = 0.12                                                                                                                                             |
|                                                                       |                                                   |                | Participation (CAPE) - Skill-based activities                          | Δ = 0.2 ± 0.5                                 | Δ = -0.6 ± 0.9                                | p = <0.001                                                                                                                                           |
|                                                                       |                                                   |                | Participation (CAPE) - Self-improvement activities                     | Δ = -0.1 ± 0.9                                | Δ = -0.5 ± 0.8                                | p = 0.10                                                                                                                                             |
|                                                                       |                                                   |                | Health-related quality of life (TACQOL-PF) - Pain and symptoms         | Δ = -0.14 ± 3.6                               | Δ = -1.0 ± 2.3                                | p = 0.30                                                                                                                                             |
|                                                                       |                                                   |                | Health-related quality of life (TACQOL-PF) - Basic motor functions     | Δ = 2.1 ± 4.3                                 | Δ = -1.7 ± 4.3                                | p = <0.001                                                                                                                                           |
|                                                                       |                                                   |                | Health-related quality of life (TACQOL-PF) - Autonomy                  | Δ = 0.5 ± 4.3                                 | Δ = -0.2 ± 3.1                                | p = 0.02                                                                                                                                             |
|                                                                       |                                                   |                | Health-related quality of life (TACQOL-PF) - Cognitive functioning     | Δ = 0.9 ± 4.7                                 | Δ = -0.2 ± 4.0                                | p = 0.04                                                                                                                                             |
| Health-related quality of life (TACQOL-PF) - Social functioning       | Δ = 0.7 ± 4.0                                     | Δ = 0.0 ± 3.9  | p = 0.13                                                               |                                               |                                               |                                                                                                                                                      |
| Health-related quality of life (TACQOL-PF) - Global positive emotions | Δ = 0.3 ± 3.9                                     | Δ = -0.1 ± 1.9 | p = 0.25                                                               |                                               |                                               |                                                                                                                                                      |
| Health-related quality of life (TACQOL-PF) - Global negative emotions | Δ = 0.7 ± 2.9                                     | Δ = -0.1 ± 1.9 | p = 0.15                                                               |                                               |                                               |                                                                                                                                                      |
| Wang et al. (2013)                                                    | Motivation: music during PRT (6 weeks; 12 weeks)  | I:18 C:18      | PEDI mobility (function)                                               | 73.0 ± 12.5; 75.1 ± 11.5; 76.2 ± 10.7. p<0.05 | 73.2 ± 13.9; 74.3 ± 13.6; 74.2 ± 13.2. p<0.05 | pre-post: p=0.12 ES=0.28. pre-follow up: p=0.09 ES=0.31                                                                                              |
|                                                                       |                                                   |                | PEDI self-care (function)                                              | 77.4 ± 13.7; 78.6 ± 12.8; 79.9 ± 11.9. p<0.05 | 75.0 ± 10.8; 75.9 ± 11.0; 78.0 ± 10.8. p<0.05 | pre-post: p=0.47 ES=0.13. pre-follow up: p=0.78 ES=0.05                                                                                              |

**GROSS MOTOR FUNCTION**

| Study                                                    | Intervention type (duration pre-post; post-follow up [when available])                               | Subject number            | Outcomes                   | Intervention group                            | Control group                                    | Intervention effectiveness                                                                                                                           |
|----------------------------------------------------------|------------------------------------------------------------------------------------------------------|---------------------------|----------------------------|-----------------------------------------------|--------------------------------------------------|------------------------------------------------------------------------------------------------------------------------------------------------------|
| <b>RCTs with wheelchair users</b>                        |                                                                                                      |                           |                            |                                               |                                                  |                                                                                                                                                      |
| Jansen, et al. (2013)                                    | Cycling: arm and peddle (24 weeks; 24 weeks)                                                         | I: 17 C: 13               | Motor Function Measure     | 65.1 ± 15.6; 65.6 ± 16.9; 64.6 ± 14.7         | 70.9 ± 13.7; 61.5 ± 13.0; NA                     | pre-post: Δ (95%CI) = 4.9 (2.2 - 7.6). P=0.002. post-follow up: Δ= -5.7 P = .01                                                                      |
| Van Wely, et al. (2014) b                                | Complex: Life-style counselling and fitness training (6 months; 6 months)                            | I: 23 C: 23               | GMFM-66                    | 77 ± 14; 79 ± 13; 79 ± 14                     | 80 ± 14; 79 ± 14; 82 ± 14                        | Δ (95%CI). pre-post: 2.8 (0.2 - 5.4). pre-follow up: -0.9 (-3.3 - 1.4)                                                                               |
| <b>Non-RCTs with wheelchair users</b>                    |                                                                                                      |                           |                            |                                               |                                                  |                                                                                                                                                      |
| Gordon, et al. (2013)                                    | Nintendo Wii (6weeks; -)                                                                             | I:7 C: -                  | GMFM-88                    | 63 ± 25; 70 ± 24. NA                          |                                                  | NA                                                                                                                                                   |
| Odman , P., 2005                                         | Functional exercises (Lemo vs Move&Walk) (4 weeks)                                                   | Lemo:24, Move and Walk:30 | GMFM Total                 | <b>LEMO:</b> 53.2 ± 29.1; 55.9 ± 29.5         | <b>Move&amp;Walk:</b> 37.7 ± 30.0; 38.9 ± 30.4   | Lemo: p= 0.0003; M&W: p =0.0001. Interaction = NS                                                                                                    |
|                                                          | Functional exercises (combined Lemo + Move&Walk) (4 weeks intensive; 1 year voluntary participation) |                           | GMFM Total                 | 44.6 + 30.3; 46.5 + 30.9; 48.1 + 31.4         |                                                  | pre-4 weeks: p = 0.0001, 4 weeks-1 year: NS                                                                                                          |
| Unnithan, V.B., 2007                                     | Complex programme (PRT and walking) (12 weeks)                                                       | I : 7 , C: 6              | GMFM D and E (total score) | 30.35 ± 16.95; 33.85 ± 17.87, p < 0.05        | 30.76 ± 12.52; 30.76 ± 12.52, NS                 | p = 0.05                                                                                                                                             |
| <b>RCT with population with undefined wheelchair use</b> |                                                                                                      |                           |                            |                                               |                                                  |                                                                                                                                                      |
| Choi, J.A. et al. (2016)                                 | spirometer exercise with vs without additional therapy (4 weeks; -)                                  | I:25 C:23                 | GMFM-66                    | 53.83 ± 24.93; 57.37 ± 23.34. p=0.001         | 57.92 ± 23.97; 61.58 ± 24.24. p=0.003            | p= 0.916                                                                                                                                             |
| Dodd, K. J.; 2003                                        | PRT with functional exercises (6 weeks; 12 weeks)                                                    | I: 11 C: 10               | GMFM D, %                  | 75.2 ± 14.4; 80.1 ± 13.7; 80.4 ± 13.2         | 74.6 ± 20.9; 80.5 ± 12.6; 80.7 ± 15.0            | NA                                                                                                                                                   |
|                                                          |                                                                                                      |                           | GMFM E , %                 | 52.8 ± 31.3; 57.2 ± 29.7; 58.2 ± 31.3         | 68.3 ± 30.1; 69.5 ± 27.9; 67.8 ± 28.6            | pre-post: p=0.07 F(1,19)=3.80, pre:follow-up: NA                                                                                                     |
|                                                          |                                                                                                      |                           | GMFM total, %              | 64.2 ± 27.8; 69.0 ± 21.4; 69.6 ± 21.4         | 71.7 ± 24.9; 75.3 ± 21.3; 74.3 ± 21.4            | NA                                                                                                                                                   |
| Fowler, E. G., 2010                                      | Cycling / complex: strengthening and cardiorespiratory phases in each session (12 weeks)             | I: 26, C: 26              | GMFM-66                    | 69.6 (65.4-73.9); 70.8 (66.6 to 74.9) p=0.002 | 68.8 (64.5 to 73.0); 69.3 (65.4 to 73.3), p=0.12 | p= 0.23                                                                                                                                              |
| Scholtes, V. A., et al, 2010                             | PRT with functional exercises (12 weeks; 6 weeks)                                                    | I: 24 C: 23               | GMFM-66 (1-100)            | 76.1 ± 12.8; 76.1 ± 11.8; 76.6 ± 13.0         | 71.8 ± 12.5; 73.1 ± 12.4; 72.7 ± 12.8            | Pre-Post: p = 0.48 Regression coefficient (95% CI) = -0.56 (-2.11-0.99). Pre=follow-up: p = 0.73 Regression coefficient (95% CI) = 0.26 (-1.23-1.76) |
| Verschuren, O., et al,;2007                              | Functional exercises (8 months)                                                                      | I: 32 C: 33               | GMFM D (standing)          | Δ = 2.6 ± 5.4                                 | Δ = -0.7 ± 5.1                                   | p = 0.03                                                                                                                                             |
|                                                          |                                                                                                      |                           | GMFM E (walking)           | Δ = 1.5 ± 6.4                                 | Δ = -0.9 ± 3.5                                   | p = 0.27                                                                                                                                             |

|                    |                                                  |           |         |                                                  |                                               |                                                          |
|--------------------|--------------------------------------------------|-----------|---------|--------------------------------------------------|-----------------------------------------------|----------------------------------------------------------|
| Wang et al. (2013) | Motivation: music during PRT (6 weeks; 12 weeks) | I:18 C:18 | GMFM: D | 79.3 ± 13.4; 83.5 ± 8.7; 82.6 ± 11.6.<br>p<0.05  | 79.9 ± 11.8; 80.3 ± 11.4; 80.9 ± 11.7. p<0.05 | pre-post: p=0.004 ES=0.54. pre-follow up: p=0.06 ES=0.34 |
|                    |                                                  |           | GMFM: E | 63.3 ± 23.4; 67.8 ± 23.4; 69.2 ± 22.8.<br>p<0.05 | 62.0 ± 26.1; 64.0 ± 25.9; 65.4 ± 25.4. p<0.05 |                                                          |

**non-RCT with population with undefined wheelchair use**

|                  |                                              |           |    |                                 |                          |                          |                                        |
|------------------|----------------------------------------------|-----------|----|---------------------------------|--------------------------|--------------------------|----------------------------------------|
| Chen et al. 2012 | Cycling in Virtual Reality (Home) (12 weeks) | I: 13, 15 | C: | Gross motor function: The BOTMP | 30.6 ± 13.2, 34.2 ± 23.2 | 26.8 ± 10.0, 22.9 ± 12.4 | ANCOVA, effect size = 0.090, p = 0.130 |
|------------------|----------------------------------------------|-----------|----|---------------------------------|--------------------------|--------------------------|----------------------------------------|

| Crompton, J., et al 2007            | PRT with functional exercises (plus upper body dexterity) (6 weeks; 6 weeks)                                     | I: 6                                                                                                             | C: 7                                                          |                            | Lower Limb                                                                                                      | Upper Limb                                                                                                      |                                                          |
|-------------------------------------|------------------------------------------------------------------------------------------------------------------|------------------------------------------------------------------------------------------------------------------|---------------------------------------------------------------|----------------------------|-----------------------------------------------------------------------------------------------------------------|-----------------------------------------------------------------------------------------------------------------|----------------------------------------------------------|
|                                     |                                                                                                                  |                                                                                                                  |                                                               | Gross Motor function 66, % | Median (25th;75th centile): 73.1 (70.0;76.8), 72.6 (70.0;79.9), 72.6 (71.7;80.9). Overall time effect p = 0.495 | Median (25th;75th centile): 71.2 (62.3; 75.7); 71.4 (62.2; 79.7); 72.5(64;79.1). overall time effect: p = 0.244 | Pre-Post: p=0.32 z=-1.0; Pre-follow-up: p=0.83 z = -0.22 |
| Gross Motor Function Dimension D, % | Median (25th;75th centile): 82.1 (76.9;87.2); 84.6 (79.5;92.3); 87.2 (79.5;92.3). Overall time effect: p = 0.540 | Median (25th;75th centile): 78.2 (67.3;82.1); 79.5 (67.3;85.9); 83.3 (75.6;86.5). Overall time effect: p = 0.01  | Pre-Post: p = 0.89 z = -0.15. Pre-follow-up: p=0.28 z = -1.08 |                            |                                                                                                                 |                                                                                                                 |                                                          |
| Gross Motor Function Dimension E, % | Median (25th;75th centile): 83.3 (79.2;94.4); 83.3 (76.4;93.1); 80.6 (77.8;94.4). Overall time effect: p = 0.070 | Median (25th;75th centile): 79.9 (51.0;88.5); 79.2 (48.6;92.7); 79.2 (49.5;91.9). Overall time effect: p = 0.834 | Pre-Post: p=0.43 z = 0.79; Pre-follow-up: p=0.22 z = -1.22    |                            |                                                                                                                 |                                                                                                                 |                                                          |

**MOBILITY**

| Study                                                    | Intervention type (duration pre-post; post-follow up [when available])                   | Subject number | Outcomes                             | Intervention group                                           | Control group                                    | Intervention effectiveness                                                                                                                            |
|----------------------------------------------------------|------------------------------------------------------------------------------------------|----------------|--------------------------------------|--------------------------------------------------------------|--------------------------------------------------|-------------------------------------------------------------------------------------------------------------------------------------------------------|
| <b>RCTs with wheelchair users</b>                        |                                                                                          |                |                                      |                                                              |                                                  |                                                                                                                                                       |
| Jansen, et al. (2013)                                    | Cycling: arm and peddle (24 weeks; 24 weeks)                                             | I: 17 C: 13    | Raise from floor (s)                 | 6.3 ± 4.6; 4.8 ± 1.6; NA                                     | 8.8 ± 5.3; 21.1 ± 18.0; NA                       | Pre-post: Δ=16.3. p=0.961.                                                                                                                            |
|                                                          |                                                                                          |                | 10m run (s)                          | 6.4 ± 1.7; 7.4 ± 3.9; NA                                     | 8.2 ± 2.2; 7.3 ± 1.8; NA                         | Pre-post: Δ = -0.7. p=0.522.                                                                                                                          |
| Van Wely, et al. (2014) b                                | Complex: Life-style counselling and fitness training (6 months; 6 months)                | I: 23 C: 23    | 1-min walk (m)                       | 86 ± 20; 92 ± 25; 91 ± 25                                    | 92 ± 20; 96 ± 17; 93 ± 19                        | Δ (95%CI). pre-post: 2 (-4 - 9). pre-follow up: 3 (-43 - 10)                                                                                          |
| <b>RCT with population with undefined wheelchair use</b> |                                                                                          |                |                                      |                                                              |                                                  |                                                                                                                                                       |
| DeGroot, J.F., 2011                                      | Walking (treadmill with body weight support) (12 weeks)                                  | I:18,C:14      | Peak walking speed                   | 5.2 ± 2.0, Δ = 0.9 ± 0.8, p < 0.05                           | 5.7 ± 1.9, Δ = -0.06 ± 0.6, NS                   | p = 0.001, d =1.14                                                                                                                                    |
| Dodd, K. J.; 2003                                        | PRT with functional exercises (6 weeks; 12 weeks)                                        | I: 11 C: 10    | Self-selected walking speed, m/min   | 47.4 ± 23.3; 48.0 ± 21.2; 48.6 ± 23.3                        | 49.5 ± 24.5; 50.5 ± 20.8; 51.4 ± 16.5            | NA                                                                                                                                                    |
|                                                          |                                                                                          |                | Timed stair, s                       | 27.4 ± 34.7; 21.1 ± 25.6; 25.1 ± 33.6                        | 22.4 ± 20.5; 21.7 ± 21.5; 19.7 ± 15.2            | Pre-Post: p=0.10 F(1,19)=2.97. Pre-folow-up: NA                                                                                                       |
| Fowler, E. G., 2010                                      | Cycling / complex: strengthening and cardiorespiratory phases in each session (12 weeks) | I: 26, C: 26   | 600-Yard Walk-Run Test speed (m/min) | 85.0 (69.7 - 100.4); 90.6 (75.4 - 105.7), p=0.008            | 81.6 (65.9 - 97.4); 84.1 (67.6 - 100.7) p=0.16   | p = 0.24                                                                                                                                              |
|                                                          |                                                                                          |                | 30s Walk Test speed (m/min)          | 66.9 (58.6 - 75.1); 68.0 (60.4 - 75.7), p = 0.64             | 58.7 (51.0 - 66.5); 62.1 (54.4 - 69.8), p = 0.18 | p = 0.52                                                                                                                                              |
| Katz-Leurer, M., 2009                                    | Functional exercises at home (6 weeks; 6 weeks for intervention group only)              | I:8, C:10      | Balance performance FRF (cm)         | 18.7 ± 5.2, Δ = 3.0 ± 1.6; Δ = 0.1 ± 2.1, p = 0.89           | 19.3 ± 4.8, Δ = 1.9 ± 4.0                        | p = 0.01                                                                                                                                              |
|                                                          |                                                                                          |                | Balance performance FRP (cm)         | 11.0 ± 2.9, Δ = 4.0 ± 3.7; Δ = 1.1 ± 4.1, p = 0.49           | 14.3 ± 3.7, Δ = 0.3 ± 3.1                        | p = 0.01                                                                                                                                              |
|                                                          |                                                                                          |                | Balance performance FRNP (cm)        | 10.5 ± 5.3, Δ = 3.2 ± 2.9; Δ = 0.2 ± 5.0, p = 0.93           | 12.5 ± 3.1, Δ = 0.4 ± 1.0                        | p = 0.10                                                                                                                                              |
|                                                          |                                                                                          |                | TUG (m/s)                            | 10.1 ± 3.0, Δ = 1.6 ± 2.1; Δ = 0.0 ± 0.9, p = 0.86           | 8.1 ± 1.6, Δ = 0.0 ± 0.7                         | p < 0.01                                                                                                                                              |
|                                                          |                                                                                          |                | Walking velocity (m/s)               | 0.96 ± 0.12, Δ = 0.04 ± 0.1; Δ = 0.05 ± 0.1, p = 0.88        | 1.02 ± 0.19, Δ = 0.01 ± 0.1                      | p = 0.84                                                                                                                                              |
|                                                          |                                                                                          |                | Two-minute walk test (m)             | 114.1 ± 23.9, Δ = 8.0 ± 13.5; Δ = 1.8 ± 11.1, p = 0.12       | 118.9 ± 22.2, Δ = 0.2 ± 22.4                     | p = 0.78                                                                                                                                              |
|                                                          |                                                                                          |                | Sit to stand                         | 15.7 ± 5.8, Δ = 3.7 ± 3.5, p = 0.02; Δ = 1.0 ± 2.4, p = 0.65 | NA, NA                                           | NA                                                                                                                                                    |
| Scholtes, V. A., et al, 2010                             | PRT with functional exercises (12 weeks; 6 weeks)                                        | I: 24 C: 23    | STS test (reps)                      | 12.9 ± 2.8; 13.6 ± 3.0; 14.3 ± 2.9                           | 10.8 ± 3.0; 12.7 ± 4.3 ; 12.7 ± 4.6              | Pre-Post: p = 0.32 Regression coefficient (95% CI) = -0.75 (-2.21-0.72); Pre-follow-up p = 0.97 Regression coefficient (95% CI) = 0.03 (-1.43-1.49)   |
|                                                          |                                                                                          |                | LSU test (reps)                      | 15.6 ± 4.0; 17.0 ± 5.1; 17.5 ± 4.8                           | 13.3 ± 5.4; 15.4 ± 4.3; 15.8 ± 6.6               | Pre-Post: p = 0.9 Regression coefficient (95% CI) = 0.48 (-1.45-2.40); Pre-follow-up: p =NA Regression coefficient (95% CI) = 0.13 (-1.84-2.10)       |
|                                                          |                                                                                          |                | Comfortable Walking Speed (m/s)      | 0.95 ± 0.29; 1.03 ± 0.33; 1.00 ± 0.28                        | 0.95 ± 0.28; 1.07 ± 0.38; 1.06 ± 0.34            | pre-post: p=0.56 Regression coefficient (95% CI) = -0.04 ( -0.18-0.10); pre-follow-up: p = 0.25 Regression coefficient (95% CI) = -0.06 ( -0.17-0.04) |

|                      |                                                   |             |                          |                                                |                                                |                                                                                                                                                     |
|----------------------|---------------------------------------------------|-------------|--------------------------|------------------------------------------------|------------------------------------------------|-----------------------------------------------------------------------------------------------------------------------------------------------------|
| Scholtes, V. A; 2012 | PRT with functional exercises (12 weeks; 6 weeks) | I: 24 C: 23 | Cadans (Steps/min)       | 109.01 ± 20.67; 113.70 ± 19.52; 112.61 ± 21.38 | 103.58 ± 25.02; 111.07 ± 26.51; 109.60 ± 23.45 | pre-Post: p=0.74 Regression coefficient (95% CI) = -1.80 (-12.22–8.62); pre-follow-up: p=0.55 Regression coefficient (95% CI) = -2.43 (-10.44–5.59) |
|                      |                                                   |             | Step Length (m)          | 1.03 ± 0.22; 1.07 ± 0.26; 1.05 ± 0.20          | 1.09 ± 0.19; 1.13 ± 0.25; 1.14 ± 0.23          | Pre-Post: p=0.82 Regression coefficient (95% CI) = -0.01 (-0.11–0.09); pre-follow-up: p=0.47 Regression coefficient (95% CI) = -0.03 (-0.10–0.05)   |
|                      |                                                   |             | Fast Walking Speed (m/s) | 1.29 ± 0.45; 1.34 ± 0.48; 1.30 ± 0.45          | 1.25 ± 0.39; 1.23 ± 0.43; 1.26 ± 0.44          | Pre-post: p=0.30 Regression coefficient (95% CI) = 0.04 (-0.04–0.12); pre-follow-up: p=0.78 Regression coefficient (95% CI) = -0.01 (-0.08–0.06)    |
|                      |                                                   |             | Timed stair test (s)     | 10.75 ± 15.93; 9.63 ± 12.06; 11.25 ± 17.34     | 14.08 ± 17.50; 12.14 ± 11.22; 11.71 ± 8.51     | Pre-Post: p=0.64 Regression coefficient (95% CI) = 0.83 (-2.64–4.30); pre-follow-up: p=0.29 Regression coefficient (95% CI) = 2.87 (-2.41–8.16)     |

|                             |                                 |             |                              |                |               |          |
|-----------------------------|---------------------------------|-------------|------------------------------|----------------|---------------|----------|
| Verschuren, O., et al.;2007 | Functional exercises (8 months) | I: 32 C: 33 | Agility 10 x 5-m Sprint Test | Δ = -4.5 ± 4.1 | Δ = 0.2 ± 4.4 | p <0.001 |
|-----------------------------|---------------------------------|-------------|------------------------------|----------------|---------------|----------|

|                    |                                                  |           |                       |                                               |                                               |                                                         |
|--------------------|--------------------------------------------------|-----------|-----------------------|-----------------------------------------------|-----------------------------------------------|---------------------------------------------------------|
| Wang et al. (2013) | Motivation: music during PRT (6 weeks; 12 weeks) | I:18 C:18 | 10 m walk speed (m/s) | 52.0 ± 17.7; 55.4 ± 16.2; 56.8 ± 16.8. p<0.05 | 46.3 ± 20.8; 49.9 ± 22.1; 50.9 ± 21.5. p<0.05 | pre-post: p=0.87 ES=0.03. pre-follow up: p=0.77 ES=0.05 |
|--------------------|--------------------------------------------------|-----------|-----------------------|-----------------------------------------------|-----------------------------------------------|---------------------------------------------------------|

**Non-RCT with population with undefined wheelchair use**

|                            |                                        |      |                                                                            |                                          |  |                                                                             |
|----------------------------|----------------------------------------|------|----------------------------------------------------------------------------|------------------------------------------|--|-----------------------------------------------------------------------------|
| Blundell, S.W. et al; 2003 | Functional exercises (6 weeks)         | I: 7 | L LSUT (repetitions)                                                       | 3.3 ± 3.3; 7.9 ± 3.8; 6.8 ± 3.8          |  | Pre-Post: p = 0.001 F(1,7) = 42.83; Post-follow-up: p = 0.065 F(1,7) = 4.77 |
|                            |                                        |      | R LSUT (repetitions)                                                       | 3.0 ± 3.5; 7.8 ± 3.8; 7.0 ± 3.5          |  | Pre-Post: p = 0.001 F(1,7) = 48.60; Post-follow-up: p = 0.142 F(1,7) = 2.74 |
|                            |                                        |      | MAS – STS Score                                                            | 1.5 ± 1.8; 2.0 ± 4.0; 2.5 ± 3.5          |  | Pre-Post: p = 0.014 F(1,7) = 6.00; Post-follow-up: p = 1.000 F(1,7) = 0.00  |
|                            |                                        |      | Min. chair height (cm)                                                     | 26.9 ± 15.3; 16.6 ± 11.5; 16.6 ± 13.5    |  | Pre-Post: p = 0.002 F(1,7) = 24.99; Post-follow-up: p = 0.413 F(1,7) = 0.76 |
|                            |                                        |      | Walking speed (m/s)                                                        | 0.70 ± 0.35; 0.88 ± 0.36; 0.86 ± 0.48    |  | Pre-Post: p = 0.079 F(1,7) = 4.21; Post-follow-up: p = 0.874 F(1,7) = 0.03  |
|                            |                                        |      | Stride length (m)                                                          | 0.67 ± 0.19; 0.82 ± 0.18; 0.79 ± 0.24    |  | Pre-Post: p = 0.008 F(1,7) = 13.66; Post-follow-up: p = 0.637 F(1,7) = 0.24 |
|                            |                                        |      | Cadence (steps/min)                                                        | 118.1 ± 39.1; 123.8 ± 31.6; 121.5 ± 43.5 |  | Pre-Post: p = 0.584 F(1,7) = 0.33; Post-follow-up: p = 0.812 F(1,7) = 0.06  |
|                            |                                        |      | 10-m walk test (s)                                                         | 20.8 ± 14.3; 14.0 ± 7.7; 18.0 ± 14.3     |  | Pre-Post: p = 0.049 F(1,7) = 5.68; Post-follow-up: p = 0.283 F(1,7) = 1.35  |
| 2-min walk test (m)        | 74.9 ± 32.4; 98.5 ± 46.2; 100.5 ± 48.7 |      | Pre-Post: p = 0.108 F(1,7) = 3.40; Post-follow-up: p = 0.748 F(1,7) = 0.11 |                                          |  |                                                                             |

|                          |                                                                              |           |                                |                                                                                                                     |                                                                                                                   |                                                             |
|--------------------------|------------------------------------------------------------------------------|-----------|--------------------------------|---------------------------------------------------------------------------------------------------------------------|-------------------------------------------------------------------------------------------------------------------|-------------------------------------------------------------|
| Crompton, J., et al 2007 | PRT with functional exercises (plus upper body dexterity) (6 weeks; 6 weeks) | I: 6 C: 7 |                                | <b>Upper Limb</b>                                                                                                   | <b>Lower Limb</b>                                                                                                 | Pre-Post: p=0.89 z = -0.14; Pre-follow-up: p=0.57 z = -0.57 |
|                          |                                                                              |           | Timed up and go (TUG), seconds | Median (25th;75th centile): 8.45 (7.73;13.34); 8.43 (6.27;12.16); 8.83 (6.46;12.25). Overall time effect: p = 0.050 | Median (25th;75th centile): 9.33 (6.91;11.53); 7.93 (6.82;8.89); 7.77 (6.43;8.67). Overall time effect: p = 0.135 |                                                             |

**STRENGTH**

| Study | Intervention type (duration pre-post; post-follow up [when available]) | Subject number | Outcomes | Intervention group | Control group | Intervention effectiveness |
|-------|------------------------------------------------------------------------|----------------|----------|--------------------|---------------|----------------------------|
|-------|------------------------------------------------------------------------|----------------|----------|--------------------|---------------|----------------------------|

**RCTs with wheelchair users**

|                       |                                              |             |                          |                            |                            |                                                  |
|-----------------------|----------------------------------------------|-------------|--------------------------|----------------------------|----------------------------|--------------------------------------------------|
| Jansen, et al. (2013) | Cycling: arm and peddle (24 weeks; 24 weeks) | I: 17 C: 13 | MRC strength scale total | 31.0 ± 5.5; 31.6 ± 1.4; NA | 31.4 ± 4.4; 28.6 ± 5.7; NA | Pre-post: Δ (95%CI) = 1.4 (-0.3 - 3.1). P=0.098. |
|-----------------------|----------------------------------------------|-------------|--------------------------|----------------------------|----------------------------|--------------------------------------------------|

|                                       |                                                                                                  |              |                            |                                                                                                                                                                                                                                  |                      |    |
|---------------------------------------|--------------------------------------------------------------------------------------------------|--------------|----------------------------|----------------------------------------------------------------------------------------------------------------------------------------------------------------------------------------------------------------------------------|----------------------|----|
| Van Den Berg-Emons, R. J., et al 1998 | Sport/games-based aerobic. (4 x per week no strength data) (9 months; 3 months)                  | I: 10, C: 10 | Isokinetic muscle strength | NA                                                                                                                                                                                                                               | NA                   | NA |
|                                       | Sport/games-based aerobic. (2 times per week participation in the training programme) (9 months) | I: 9, C: 9   | Isokinetic muscle strength | Least affected limb flexion: pre-post: Δ = 39%, p<0.01. Most affected limb flexion pre-post: Δ = 28%, p<0.05. Least affected limb extension pre-post: Δ = 12%, p = 0.05. Most affected limb extension pre-post: Δ = 24%, p<0.05. | NS, no data reported | NA |

|                           |                                                                           |             |                                   |                           |                           |                                                             |
|---------------------------|---------------------------------------------------------------------------|-------------|-----------------------------------|---------------------------|---------------------------|-------------------------------------------------------------|
| Van Wely, et al. (2014) b | Complex: Life-style counselling and fitness training (6 months; 6 months) | I: 23 C: 23 | Functional muscle strength (reps) | 43 ± 16; 51 ± 20; 53 ± 18 | 42 ± 18; 53 ± 21; 56 ± 22 | Δ (95%CI). pre-post: 0 (-5 - 5). pre-follow up: -4 (-9 - 2) |
|---------------------------|---------------------------------------------------------------------------|-------------|-----------------------------------|---------------------------|---------------------------|-------------------------------------------------------------|

**Non-RCTs with wheelchair users**

|                         |                                                                                 |            |                                                                 |                                    |                                  |         |
|-------------------------|---------------------------------------------------------------------------------|------------|-----------------------------------------------------------------|------------------------------------|----------------------------------|---------|
| Andrade, C., et al 1991 | Complex programme: PRT and cardiovascular exercise, inc psychosocial (10 weeks) | I: 7, C: 5 | Isometric muscle (shoulder flexion): absolute torques (N°m)     | 9 ± 2.6; 10.3 ± 2.4, p = 0.1       | 12.5 ± 9.68; 12.5 ± 7.8, p <0.40 | p <0.25 |
|                         |                                                                                 |            | Isometric strength (shoulder extension): absolute torques (N°m) | 6.6 ± 1.6; 7.6 ± 1.9, p = 0.05     | 9.68 ± 6; 10 ± 7.3, p <0.40      | p <0.25 |
|                         |                                                                                 |            | Isometric strength (shoulder abduction): absolute torques (N°m) | 10.7 ± 4.9; 11.3 ± 4.7, p < 0.25   | 12.4 ± 5.8; 13 ± 7.8, p <0.40    | p <0.40 |
|                         |                                                                                 |            | Isometric strength (elbow flexion): absolute torques (N°m)      | 16.8 ± 8.3; 20.3 ± 7.6, p < 0.0025 | 21.6 ± 5.1; 21.2 ± 4.3, p <0.40  | p<0.01  |
|                         |                                                                                 |            | Isometric strength (elbow extension): absolute torques (N°m)    | 17.8 ± 8.5; 19.2 ± 8.7, p <0.005   | 21.7 ± 3.1; 22.2 ± 4.3, p <0.40  | NA      |

**RCT with population with undefined wheelchair use**

|                    |                                      |             |                               |                                |                                 |                |
|--------------------|--------------------------------------|-------------|-------------------------------|--------------------------------|---------------------------------|----------------|
| DeGroot, J.F. 2011 | Walking (treadmill with body weight) | I: 18 C: 14 | Muscle Strength (Handgrip, N) | 73.9 ± 46.9, Δ = 1.6 ± 9.9, NS | 86.4 ± 55.4, Δ = -3.0 ± 7.6, NS | p = 0.2 d = NA |
|--------------------|--------------------------------------|-------------|-------------------------------|--------------------------------|---------------------------------|----------------|

|                              |                                                                                          |              |                                           |                                                   |                                                  |                                                                                                                         |
|------------------------------|------------------------------------------------------------------------------------------|--------------|-------------------------------------------|---------------------------------------------------|--------------------------------------------------|-------------------------------------------------------------------------------------------------------------------------|
| DEGROOT, J. J., 2011         | support) (12 weeks)                                                                      | I:10, C:17   | Muscle Strength (Quadriceps, N)           | 155.2 ± 62.8, Δ = -8.7 ± 71.7, NS                 | 157.9 ± 51.0, Δ = -27.2 ± 27.2, p < 0.05         | p = 0.7 d = NA                                                                                                          |
| Dodd, K. J.; 2003            | PRT with functional exercises (6 weeks; 12 weeks)                                        | I: 11 C: 10  | Strength of the ankle plantarflexors, kg  | 11.0 ± 15.8; 11.1 ± 12.5; 16.6 ± 15.2             | 17.5 ± 13.1; 15.4 ± 11.6; 13.8 ± 9.0             | NA                                                                                                                      |
|                              |                                                                                          |              | Strength of the knee extensors, kg        | 27.5 ± 10.9; 33.1 ± 15.8; 32.5 ± 11.4             | 23.7 ± 11.5; 25.5 ± 9.9; 25.2 ± 7.8              | NA                                                                                                                      |
|                              |                                                                                          |              | Strength of the hip extensors, kg         | 7.9 ± 7.6; 10.6 ± 10.2; 10.8 ± 9.1;               | 8.5 ± 8.4; 11.5 ± 10.7; 10.6 ± 8.3               | NA                                                                                                                      |
|                              |                                                                                          |              | Ankle plantarflexors + Knee extensors, kg | 38.5 ± 23.2; 44.2 ± 25.5; 49.2 ± 25.3             | 41.1 ± 20.0; 40.9 ± 20.2; 38.9 ± 15.0            | Pre-Post: p=0.046 F(1,19)=4.58; Pre-follow-up: p=0.041 F(1,18)=6.25                                                     |
|                              |                                                                                          |              | Total extensor, kg                        | 46.5 ± 29.6; 54.8 ± 34.5; 60.0 ± 33.0             | 49.6 ± 25.9; 52.4 ± 27.7; 49.5 ± 21.1            | Pre-Post: p=0.094 F(1,19)=3.12; Pre-follow-up: p=0.087 F(1,18)=3.28                                                     |
| Fowler, E. G., 2010          | Cycling / complex: strengthening and cardiorespiratory phases in each session (12 weeks) | I: 26, C: 26 | Knee extensor moments (N.m/kg) 0°/s       | 1.24 (1.04 - 1.45) ; 1.25 (1.10 - 1.41), p= 0.88  | 1.14 (1.0 - 1.28) ; 1.19 (1.02 - 1.36), p=0.25   | p = 0.55                                                                                                                |
|                              |                                                                                          |              | Knee extensor moments (N.m/kg) 30°/s      | 1.05 (0.91 - 1.19); 1.09 (0.95 - 1.22), p = 0.39  | 1.09 (0.91 - 1.27); 1.01 (0.83 - 1.19), p = 0.13 | p = 0.08                                                                                                                |
|                              |                                                                                          |              | Knee extensor moments (N.m/kg) 60°/s      | 0.88 (0.76 - 0.99) ; 0.89 (0.76 - 1.0), p = 0.76  | 0.88 (0.72 - 1.05); 0.86 (0.69 - 1.04), p = 0.63 | p = 0.58                                                                                                                |
|                              |                                                                                          |              | Knee extensor moments (N.m/kg) 120°/s     | 0.66 (0.57 - 0.75); 0.75 (0.64 - 0.85), p = 0.006 | 0.72 (0.60 - 0.84); 0.75 (0.59 - 0.92), p = 0.45 | p = 0.27                                                                                                                |
|                              |                                                                                          |              | Knee flexor moments (N.m/kg) 0°/s         | 0.46 (0.36 - 0.57); 0.47 (0.36 - 0.58), p = 0.69  | 0.40 (0.26 - 0.54); 0.45 (0.32 - 0.58), p = 0.11 | p = 0.41                                                                                                                |
|                              |                                                                                          |              | Knee flexor moments (N.m/kg) 30°/s        | 0.30 (0.23 - 0.37); 0.35 (0.27 - 0.42), p = 0.025 | 0.34 (0.23 - 0.44); 0.35 (0.24 - 0.46), p = 0.57 | p = 0.31                                                                                                                |
|                              |                                                                                          |              | Knee flexor moments (N.m/kg) 60°/s        | 0.29 (0.22 - 0.36); 0.29 (0.21 - 0.36), p = 0.95  | 0.28 (0.19 - 0.36); 0.27 (0.18 - 0.37), p = 0.94 | p = 0.99                                                                                                                |
|                              |                                                                                          |              | Knee flexor moments (N.m/kg) 120°/s       | 0.21 (0.16 - 0.26); 0.26 (0.19 - 0.32), p = 0.09  | 0.20 (0.13 - 0.28); 0.28 (0.17 - 0.38), p = 0.01 | p = 0.43                                                                                                                |
| Katz-Leurer, M., 2009        | Functional exercises at home (6 weeks; 6 weeks for intervention group only)              | I:8,C:10     | Hip abduction                             | 2.5 ± 2.5, Δ = 0.7 ± 1.9; Δ = 0.3 ± 1.4, p = 0.89 | 3.7 ± 2.5, Δ = 0.8 ± 1.1                         | p = 0.88                                                                                                                |
|                              |                                                                                          |              | Hip extension                             | 4.1 ± 3.7, Δ = 1.6 ± 2.2; Δ = 0.6 ± 1.2 p = 0.22  | 5.7 ± 3.6, Δ = 0.7 ± 1.3                         | p = 0.36                                                                                                                |
|                              |                                                                                          |              | Knee extensors                            | 4.9 ± 3.5, Δ = 0.2 ± 4.4; Δ = 0.0 ± 0.8 p = 0.75  | 6.6 ± 3.7, Δ = 0.0 ± 0.7                         | p = 0.63                                                                                                                |
|                              |                                                                                          |              | Knee flexors                              | 3.0 ± 3.2, Δ = 0.0 ± 3.0; Δ = 0.3 ± 1.4 p = 0.46  | 4.2 ± 2.2, Δ = 0.1 ± 1.0                         | p = 0.88                                                                                                                |
| Scholtes, V. A., et al, 2010 | PRT with functional exercises (12 weeks; 6 weeks)                                        | I: 24 C: 23  | Knee Extensors (N/Kg)                     | 4.78 ± 1.12; 5.39 ± 1.10; 5.20 ± 1.04             | 4.36 ± 1.05; 4.48 ± 1.12; 4.46 ± 1.20            | p , Regression coefficient (95% CI). pre-post: p = 0.01, 0.56 (0.13-0.99) ; pre-follow-up: p = 0.16, 0.35 (-0.16-0.85)  |
|                              |                                                                                          |              | Knee Flexors (N/Kg)                       | 2.73 ± 0.79; 2.76 ± 0.75; 2.67 ± 0.86             | 2.25 ± 0.96; 2.27 ± 1.02; 2.33 ± 0.90            | p , Regression coefficient (95% CI). pre-post: p = 0.71, 0.05 (-0.25-0.36). Pre-follow-up: p = 0.58, -0.10 (-0.43-0.24) |
|                              |                                                                                          |              | Hip Flexors (N/Kg)                        | 3.96 ± 0.75; 4.43 ± 0.99; 4.46 ± 0.90             | 3.76 ± 0.99; 4.12 ± 0.99; 4.43 ± 0.86            | p , Regression coefficient (95% CI). pre-post: p = 0.41, 0.16 (-0.22-0.55); Pre-follow-up: p = 0.55, -0.12 (-0.50-0.27) |
|                              |                                                                                          |              | Hip Abductors (N/Kg)                      | 2.66 ± 0.76; 2.78 ± 0.85; 2.90 ± 0.99             | 2.41 ± 0.74; 2.28 ± 0.70; 2.45 ± 0.94            | p , Regression coefficient (95% CI). pre-post: p = 0.05, 0.27 (0.00-0.54); pre-follow-up: p = 0.17, 0.23 (-0.10-0.56)   |



|  |                 |  |                                                     |                                                 |                                                |                                                                                                                          |
|--|-----------------|--|-----------------------------------------------------|-------------------------------------------------|------------------------------------------------|--------------------------------------------------------------------------------------------------------------------------|
|  | WEEKS, 0 WEEKS) |  | Ankle plantarflexors (N/Kg)                         | 3.90 ± 1.43; 4.53 ± 2.16; 5.01 ± 2.26           | 3.11 ± 0.87; 3.54 ± 0.94; 4.38 ± 1.49          | p , Regression coefficient (95% CI). pre-post: p = 0.51, 0.23 (-0.47-0.93); pre-follow-up: p = 0.72, -0.16 (-1.01-0.69)  |
|  |                 |  | Total                                               | 18.04 ± 3.52; 19.88 ± 4.13; 20.39 ± 4.49        | 15.94 ± 3.57; 16.65 ± 4.11; 17.80 ± 4.01       | p , Regression coefficient (95% CI). pre-post: p = 0.04, 1.30 (0.56-2.54); pre-follow-up: p = 0.58, 0.40 (-1.02-1.83)    |
|  |                 |  | Six-repetition maximum on leg press (% body weight) | 112.78 ± 21.28 ; 135.63 ± 31.87; 129.90 ± 32.15 | 93.76 ± 20.18; 102.88 ± 26.76 ; 111.99 ± 26.17 | p , Regression coefficient (95% CI). Pre-Post: p = 0.02, 14.17 (1.99-26.35); pre-follow-up: p = 0.58, 3.42 (-8.62-15.46) |

|                             |                                 |             |                       |               |                 |          |
|-----------------------------|---------------------------------|-------------|-----------------------|---------------|-----------------|----------|
| Verschuren, O., et al.;2007 | Functional exercises (8 months) | I: 32 C: 33 | Muscle strength left  | Δ = 6.9 ± 7.2 | Δ = -1.9 ± 8.7  | p <0.001 |
|                             |                                 |             | Muscle strength right | Δ = 7.7 ± 9.0 | Δ = -1.9 ± 10.0 | p <0.001 |

|                    |                                                  |           |                        |                                               |                                               |                                                         |
|--------------------|--------------------------------------------------|-----------|------------------------|-----------------------------------------------|-----------------------------------------------|---------------------------------------------------------|
| Wang et al. (2013) | Motivation: music during PRT (6 weeks; 12 weeks) | I:18 C:18 | 1-RM sit-to-stand (kg) | 12.0 ± 5.3; 17.5 ± 7.0; 16.6 ± 7.1.<br>p<0.05 | 10.9 ± 6.1; 13.9 ± 6.0; 13.6 ± 4.7.<br>p<0.05 | pre-post: p=0.06 ES=0.34. pre-follow up: p=0.15 ES=0.25 |
|--------------------|--------------------------------------------------|-----------|------------------------|-----------------------------------------------|-----------------------------------------------|---------------------------------------------------------|

**Non-RCT with population with undefined wheelchair use**

|                            |                                |      |                     |                                       |  |                                                                             |
|----------------------------|--------------------------------|------|---------------------|---------------------------------------|--|-----------------------------------------------------------------------------|
| Blundell, S.W. et al; 2003 | Functional exercises (6 weeks) | I: 7 | L Hip Extensors (N) | 57.1 ± 12.1; 93.1 ± 37.9; 88.2 ± 34.9 |  | Pre-Post: p = 0.018 F(1,7) = 10.4; Post-follow-up: p = 0.113 F(1,7) = 3.43  |
|                            |                                |      | R Hip Extensors     | 51.2 ± 9.4; 89.2 ± 35.6; 90.2 ± 29.2  |  | Pre-Post: p = 0.017 F(1,7) = 10.56; Post-follow-up: p = 0.936 F(1,7) = 0.01 |
|                            |                                |      | L Hip Flexors       | 25.9 ± 5.9; 39.2 ± 11.7; 45.3 ± 14.5  |  | Pre-Post: p = 0.007 F(1,7) = 15.71; Post-follow-up: 0.198 F(1,7) = 2.10     |
|                            |                                |      | R Hip Flexors       | 26.2 ± 6.7; 42.8 ± 14.8; 45.4 ± 13.6  |  | Pre-Post: p = 0.005 F(1,7) = 17.91; Post-follow-up: p = 0.513 F(1,7) = 0.48 |
|                            |                                |      | L Knee Extensors    | 39.7 ± 11.6; 52.2 ± 17.5; 58.9 ± 21.0 |  | Pre-Post: p = 0.016 F(1,7) = 10.06; Post-follow-up: p = 0.121 F(1,7) = 3.11 |
|                            |                                |      | R Knee Extensors    | 40.1 ± 10.8; 55.4 ± 17.3; 60.9 ± 22.9 |  | Pre-Post: p = 0.002 F(1,7) = 23.96; Post-follow-up: p = 0.229 F(1,7) = 1.74 |
|                            |                                |      | L Knee Flexors      | 26.2 ± 9.6; 35.6 ± 14.4; 41.9 ± 17.5  |  | Pre-Post: p = 0.104 F(1,7) = 3.48; Post-follow-up: p = 0.354 F(1,7) = 0.99  |
|                            |                                |      | R Knee Flexors      | 25.2 ± 9.5; 34.5 ± 13.7; 42.1 ± 15.7  |  | Pre-Post: p = 0.055 F(1,7) = 5.30; Post-follow-up: p = 0.169 F(1,7) = 2.35  |
|                            |                                |      | L Plantarflexors    | 45.6 ± 18.8; 57.1 ± 21.9; 61.5 ± 24.2 |  | Pre-Post: p = 0.041 F(1,7) = 6.24; Post-follow-up: p = 0.626 F(1,7) = 0.26  |
|                            |                                |      | R Plantarflexors    | 43.1 ± 24.1; 57.3 ± 22.6; 56.0 ± 17.3 |  | Pre-Post: p = 0.165 F(1,7) = 2.41; Post-follow-up: p = 0.892 F(1,7) = 0.02  |
|                            |                                |      | L Dorsiflexors      | 16.6 ± 8.0; 25.3 ± 13.6; 19.5 ± 9.0   |  | Pre-Post: p = 0.063 F(1,7) = 4.88; Post-follow-up: p = 0.089 F(1,7) = 3.89  |
|                            |                                |      | R Dorsiflexors      | 13.0 ± 7.9; 20.7 ± 11.0; 22.2 ± 12.1  |  | Pre-Post: F(1,7) = 13.19 p = 0.008; Post-follow-up: p = 0.389 F(1,7) = 0.85 |

|                  |                                              |              |                             |                           |                           |                                        |
|------------------|----------------------------------------------|--------------|-----------------------------|---------------------------|---------------------------|----------------------------------------|
| Chen et al. 2012 | Cycling in Virtual Reality (Home) (12 weeks) | I: 13, C: 15 | Knee extensor torque 60°/s  | 1.53 ± 0.64 , 1.63 ± 0.78 | 1.38 ± 0.50 , 1.35 ± 0.55 | ANCOVA, effect size = 0.149, p = 0.045 |
|                  |                                              |              | Knee extensor torque 120°/s | 1.09 ± 0.53 , 1.42 ± 0.60 | 1.11 ± 0.45 , 1.04 ± 0.59 | ANCOVA, effect size = 0.250, p = 0.008 |
|                  |                                              |              | Knee flexion torque 60°/s   | 0.50 ± 0.29, 0.47 ± 0.30  | 0.71 ± 0.40, 0.48 ± 0.33  | ANCOVA, effect size = 0.179, p = 0.028 |
|                  |                                              |              | Knee flexion torque 120°/s  | 0.47 ± 0.26, 0.64 ± 0.37  | 0.48 ± 0.21 , 0.39 ± 0.28 | ANCOVA, effect size = 0.300, p = 0.003 |

|                          |                                                                              |           |                                                                                |                                                                                                                  |                                                                                                                  |                                                            |
|--------------------------|------------------------------------------------------------------------------|-----------|--------------------------------------------------------------------------------|------------------------------------------------------------------------------------------------------------------|------------------------------------------------------------------------------------------------------------------|------------------------------------------------------------|
| Crompton, J., et al 2007 | PRT with functional exercises (plus upper body dexterity) (6 weeks; 6 weeks) | I: 6 C: 7 |                                                                                | <b>Lower Limb</b>                                                                                                | <b>Upper Limb</b>                                                                                                |                                                            |
|                          |                                                                              |           | Isometric knee extensor strength with handheld dyno. N/Kg (less impaired side) | Median (25th;75th centile): 2.82 (1.80;2.95); 2.15 (1.58;3.05); 3.00 (2.45;3.97). Overall time effect: p = 0.180 | Median (25th;75th centile): 1.88 (1.38;2.66); 2.00 (1.42;3.86); 2.65 (1.44;3.23). Overall time effect: p = 0.513 | Pre-Post: p=0.48 z = -0.71; Pre-follow-up: p=0.67 z = 0.43 |



|                      |               |       |                                                                                |                                                                                                                  |                                                                                                                  |                                                             |
|----------------------|---------------|-------|--------------------------------------------------------------------------------|------------------------------------------------------------------------------------------------------------------|------------------------------------------------------------------------------------------------------------------|-------------------------------------------------------------|
|                      | weeks)        |       | Isometric knee extensor strength with handheld dyno. N/Kg (More impaired side) | Median (25th;75th centile): 2.45 (1.80;3.15); 2.38 (1.88;3.13); 2.83 (2.39;3.09). Overall time effect: p = 0.867 | Median (25th;75th centile): 2.02 (1.60;2.45); 2.59 (1.48;3.67); 2.75 (2.24;3.98). Overall time effect: p = 0.006 | Pre-Post: p=0.15 z = -1.43; Pre-follow-up: p=0.09 z = -1.71 |
| Damiano, D. L., 1995 | PRT (6 weeks) | I: 14 | Quadriceps 90 degrees                                                          | 115.8 ± 26.6; 173.1 ± 51.8                                                                                       |                                                                                                                  | p < 0.001                                                   |
|                      |               |       | Quadriceps 60 degrees                                                          | 88.2 ± 27.1; 162.9 ± 48.2                                                                                        |                                                                                                                  | p < 0.001                                                   |
|                      |               |       | Quadriceps 30 degrees                                                          | 54.4 ± 23.2; 134.0 ± 44.7                                                                                        |                                                                                                                  | p < 0.001                                                   |
|                      |               |       | Hamstrings                                                                     | Pre-3 weeks: 56.8 ± 31.8; 67.7 ± 32.1                                                                            |                                                                                                                  | p = 0.085                                                   |

**PHYSICAL ACTIVITY LEVELS**

| Study | Intervention type (duration pre-post; post-follow up [when available]) | Subject number | Outcomes | Intervention group | Control group | Intervention effectiveness s |
|-------|------------------------------------------------------------------------|----------------|----------|--------------------|---------------|------------------------------|
|-------|------------------------------------------------------------------------|----------------|----------|--------------------|---------------|------------------------------|

**RCTs with wheelchair users**

|                                       |                                                                                                           |               |                                                                                 |                                        |                                  |    |
|---------------------------------------|-----------------------------------------------------------------------------------------------------------|---------------|---------------------------------------------------------------------------------|----------------------------------------|----------------------------------|----|
| Van Den Berg-Emons, R. J., et al 1998 | Sport/games-based aerobic.(4 times per week participation in the training programme) (9 months; 3 months) | I : 10, C: 10 | Level of daily physical activity (calculated as the ratio of TEE to SMR or RMR) | 1.34 ± 0.25; 1.55 ± 0.18; NA. p = 0.07 | 1.24 ± 0.21; 1.34 ± 0.20; NA. NS | NS |
|                                       | Sport/games-based aerobic. (2 times per week participation in the training programme) (9 months)          | I: 9, C: 9    | Level of daily physical activity (calculated as the ratio of TEE to SMR or RMR) | 1.18 ± 0.2; 1.29 ± 0.2; NA. p<0.05     | 1.24 ± 0.21; 1.34 ± 0.20. NS     | NS |

|                           |                                                                           |             |                                                         |                                                            |                                                           |                                                                          |
|---------------------------|---------------------------------------------------------------------------|-------------|---------------------------------------------------------|------------------------------------------------------------|-----------------------------------------------------------|--------------------------------------------------------------------------|
| Van Wely, et al. (2014) b | Complex: Life-style counselling and fitness training (6 months; 6 months) | I: 23 C: 23 | Strides (n/day)                                         | 347 ± 98; 369 ± 97; 393 ± 92                               | 354 ± 95; 347 ± 77; 381 ± 81                              | Δ (95%CI) pre-post: 26 (-10 to 61). pre-follow up: 22 (-19 - 62)         |
|                           |                                                                           |             | Objective Inactive time (minutes/day)                   | 347 ± 98; 369 ± 97; 393 ± 92                               | 354 ± 95; 347 ± 77; 381 ± 81                              | Δ (95%CI). pre-post: 26 (-10 - 61). pre-follow up: 22 (-19 - 62)         |
|                           |                                                                           |             | Parent reported: Moderate to vigorous activity (min/wk) | Median (IQR): 365 (110–490); 780 (303–1093); 378 (179–623) | Median (IQR): 400 (160–635); 317 (71–668); 360 (215–590)  | Δ (95%CI). pre-post: 2.2 (1.1 - 4.4). pre-follow up: 1.1 (0.7 - 1.8)     |
|                           |                                                                           |             | Parent reported: Inactive (min/wk)                      | 2653 ± 1065; 2199 ± 996; 2223 ± 944                        | 2659 ± 812; 2170 ± 1320; 2783 ± 1058                      | Δ (95%CI). pre-post: 140 (-550 - 831). pre-follow up: -494 (-1099 - 111) |
|                           |                                                                           |             | Children's attitude disadvantages                       | Median (IQR): 4.0 (3.7–4.4); 4.0 (3.6–4.5); 4.1 (3.6–4.4)  | Median (IQR): 4.0 (3.7–4.6); 4.0 (3.4–4.3); 3.9 (3.5–4.5) | pre-post: p = 0.08. pre-follow up: p = 0.04                              |
|                           |                                                                           |             | Children's attitude advantages                          | Median (IQR): 3.5 (3.0–3.8); 3.7 (3.1–4.2); 4.0 (3.6–4.3)  | Median (IQR): 3.8 (3.5–4.2); 3.7 (3.1–4.2); 3.7 (3.3–4.1) | pre-post: p = 0.02. pre-follow up: p = 0.56                              |
|                           |                                                                           |             | Parents' attitude disadvantages                         | Median (IQR): 4.13 (0.60); NA; 4.07 (0.56)                 | Median (IQR): 4.22 (0.58); NA; 4.19 (0.46)                | Δ (95%CI). pre-follow up: -0.08 (-0.36 - 0.21)                           |
|                           |                                                                           |             | Parents' attitude advantages                            | Median (IQR): 3.40 (0.48); NA; 3.34 (0.67)                 | Median (IQR): 3.47 (0.50); NA; 3.48 (0.67)                | Δ (95%CI). pre-follow up: -0.11 (-0.53 - 0.31)                           |

**non-RCTs with wheelchair users**

|                       |                          |          |                       |                           |  |    |
|-----------------------|--------------------------|----------|-----------------------|---------------------------|--|----|
| Gordon, et al. (2013) | Nintendo Wii (6weeks; -) | I:7 C: - | Percentage attendance | 100% amongst 6 completers |  | NA |
|-----------------------|--------------------------|----------|-----------------------|---------------------------|--|----|

**RCT with population with undefined wheelchair use**

|                     |                                                         |            |                                          |                                    |                                      |                 |
|---------------------|---------------------------------------------------------|------------|------------------------------------------|------------------------------------|--------------------------------------|-----------------|
| DeGroot, J.F., 2011 | Walking (treadmill with body weight support) (12 weeks) | I:18 ,C:14 | Self-reported physical activity (min/wk) | 415.4 ± 171 , Δ = -8.3 ± 273.1. NS | 335.2 ± 176.2, Δ = -22.4 ± 145.3. NS | p = 0.66 d = NA |
|---------------------|---------------------------------------------------------|------------|------------------------------------------|------------------------------------|--------------------------------------|-----------------|

|                   |                                               |            |                                               |                                             |                                             |                                                              |
|-------------------|-----------------------------------------------|------------|-----------------------------------------------|---------------------------------------------|---------------------------------------------|--------------------------------------------------------------|
| Maher, C.A., 2010 | Internet-based education (10 weeks; 10 weeks) | I:41, C:41 | Weekly Step counts                            | 59329 ± 28102; 61749 ± 20972; 68803 ± 30085 | 60558 ± 22203; 48369 ± 21390; 57202 ± 28340 | Pre-post: p = 0.06 F = 3.9; pre-follow-up: p = 0.14 F = 2.1  |
|                   |                                               |            | Weekly MVPA minutes                           | 140.8 ± 89.7,210.4 ± 76.2,241.1 ± 119.1     | 139 ± 83.0,146.5 ± 78.4,196.6 ± 122.0       | Pre-post: p = 0.06 F = 3.7; pre-follow-up: p = 0.27, F = 1.3 |
|                   |                                               |            | Weekly Distance                               | 42.3 ± 23.4, 45.3 ± 17.5 ,49.3 ± 22.8       | 44.6 ± 18.8,35.5 ± 16.0,40.5 ± 21.4         | Pre-post: p = 0.05 F = 4.1; pre-follow-up: p = 0.09 F = 2.5  |
|                   |                                               |            | Average daily physical activity level (MARCA) | 1.46 ± 0.18,1.43 ± 0.14 ,1.47 ± 0.16        | 1.46 ± 0.14,1.45 ± 0.14,1.48 ± 0.15         | Pre-post: p= 0.56 F = 0.4; pre-follow-up: p = 0.83 F = 0.2   |
|                   |                                               |            | Average daily MVPA (minutes MARCA)            | 76.7 ± 69.3,66.6 ± 55.7,77.2 ± 60.2         | 86.7 ± 59.6, 64.2 ± 36.6, 85.7 ± 71.0       | Pre-post: p= 0.88 F = 0.9; pre-follow-up: p = 0.78 F = 0.3   |

|                                                              |                                                                                   |             |                                                                    |                                                                                                                  |                                                                                                                |                                                             |
|--------------------------------------------------------------|-----------------------------------------------------------------------------------|-------------|--------------------------------------------------------------------|------------------------------------------------------------------------------------------------------------------|----------------------------------------------------------------------------------------------------------------|-------------------------------------------------------------|
|                                                              |                                                                                   |             | Average daily screen time (minutes; MARCA)                         | 280.1 ± 104.5, 292.3 ± 136.7, 283.1 ± 120.6                                                                      | 220.1 ± 83.1, 272.9 ± 109.1, 248.5 ± 119.3                                                                     | Pre-post: p= 0.17 F = 1.9 ; pre-follow-up: p = 0.39 F = 1.0 |
| Verschuren, O., et al.;2007                                  | Functional exercises (8 months)                                                   | I: 32 C: 33 | Participation (CAPE) - Physical activities                         | Δ = 0.3 ± 0.8                                                                                                    | Δ = -0.3 ± 0.7                                                                                                 | p = 0.005                                                   |
| <b>Non-RCT with population with undefined wheelchair use</b> |                                                                                   |             |                                                                    |                                                                                                                  |                                                                                                                |                                                             |
| Crompton, J., et al 2007                                     | PRT with functional exercises (plus upper body dexterity) (6 weeks; 6 weeks)      | I: 6 C: 7   |                                                                    | <b>Lower Limb</b>                                                                                                | <b>Upper Limb</b>                                                                                              | pre-post: p=0.19 z=-1.29; pre-follow-up: p=1.0 z=0.0        |
|                                                              |                                                                                   |             | Time spent upright (standing/walking) by positional activity       | Median (25th;75th centile): 5.60 (4.64;6.77); 5.18 (4.29;6.28); 4.38 (3.84;6.65). Overall time effect: p = 0.066 | Median (25th;75th centile): 4.66 (3.78;5.50); 3.93 (3.01;4.63); 3.77 (3.47;5.94). Overall time effect: p=0.311 |                                                             |
| Lancioni, G.E., 2004                                         | Emotional stimulation (~7 months)                                                 | I:2, C:-    | Frequency of half pedalling cycles                                 | Participant 1: 309; 900. Participant 2: 381; 610                                                                 | NA                                                                                                             | p<0.05                                                      |
|                                                              |                                                                                   |             | Frequency of step contact                                          | Participant 1: 43; 144. Participant 2: 107; 173                                                                  | NA                                                                                                             | p<0.05                                                      |
| Slaman, et al. (2014)                                        | Complex: Life-style counselling and cardio-pulmonary fitness (6 months; 6 months) | I:17 C:19   | Objective sedentary time (% wakening day)                          | 41.09 ± 16.77; 43.91 ± 4.90; 38.69 ± 6.67                                                                        | 46.16 ± 12.67; 46.05 ± 13.07; 46.76 ± 12.52                                                                    | NS                                                          |
|                                                              |                                                                                   |             | Objective dynamic activities (% 24h)                               | 8.80 ± 3.12; 8.53 ± 4.30; 9.13 ± 3.35                                                                            | 8.26 ± 2.94; 7.88 ± 3.77; 7.92 ± 4.63                                                                          | NS                                                          |
|                                                              |                                                                                   |             | Physical Activity Scale for Individuals with Physical Disabilities | 12.75 ± 8.09; 20.29 ± 14.07; 17.09 ± 10.86                                                                       | 12.56 ± 8.69; 14.12 ± 10.38; 15.78 ± 11.48                                                                     | pre-post: p=0.05. pre-follow up: NS                         |



**UNCONVENTIONAL REPORTING STATS**

| Study                      | Intervention type (duration pre-post; post-follow up [when available]) | Subject number                                                             | Outcomes                                                                                      |
|----------------------------|------------------------------------------------------------------------|----------------------------------------------------------------------------|-----------------------------------------------------------------------------------------------|
| Buffart, L.M; et al (2010) | Complex programme personalised activities (10 weeks)                   | Sample: 2 disabled participants - one ambulatory and other non-ambulatory) |                                                                                               |
|                            |                                                                        |                                                                            | Ambulatory status                                                                             |
|                            |                                                                        |                                                                            | Attendance rate of the fitness training                                                       |
|                            |                                                                        |                                                                            | Self-reported physical activity scale - Rating of perceived exertion                          |
|                            |                                                                        |                                                                            | PASIPD (Physical Activity Scale for Individuals with Physical Disabilities) total (kJ/kg/day) |
|                            |                                                                        |                                                                            | Distance 6MWD (m)                                                                             |
|                            |                                                                        |                                                                            | Peak V_ O2 (L/min)                                                                            |
|                            |                                                                        |                                                                            | PeakW (W)                                                                                     |
|                            |                                                                        |                                                                            | PeakHR (bpm)                                                                                  |
|                            |                                                                        |                                                                            | PeakRER                                                                                       |
|                            |                                                                        |                                                                            | Satisfaction with the intervention. Numeric scale (0-10)                                      |
|                            |                                                                        |                                                                            |                                                                                               |
|                            |                                                                        |                                                                            | Energy expenditure index (EEI)                                                                |
|                            |                                                                        |                                                                            | EEI - walking speed                                                                           |
|                            |                                                                        |                                                                            | Hip abductor strength                                                                         |
|                            |                                                                        |                                                                            | 14-26                                                                                         |

|                             |                                                                                                                       |                     |                                                                                                              |
|-----------------------------|-----------------------------------------------------------------------------------------------------------------------|---------------------|--------------------------------------------------------------------------------------------------------------|
| Fragala-Pinkham, M., (2005) | PRT vs Complex programme: PRT and aerobic exercise. With follow up at home (14 weeks supervised group; 12 weeks home) | group = 9; home = 7 | Ankle plantar-flexor strength                                                                                |
|                             |                                                                                                                       |                     | Self-perception profile (SPP)                                                                                |
|                             |                                                                                                                       |                     | Functional and Gross Motor Abilities (GMFM - 66 or below)                                                    |
|                             |                                                                                                                       |                     | The Mobility domain of the Functional Skills part of the Pediatric Evaluation of Disability Inventory (PEDI) |
|                             |                                                                                                                       |                     | Bruininks-Oseretsky Test of Motor Proficiency (BOTMP)                                                        |
|                             |                                                                                                                       |                     | Shuttle run (s)                                                                                              |
|                             |                                                                                                                       |                     | 1-mile run (min)                                                                                             |
|                             |                                                                                                                       |                     | curl ups (count)                                                                                             |
|                             |                                                                                                                       |                     | modified push-ups (count)                                                                                    |
|                             |                                                                                                                       |                     | sit and reach (cm)                                                                                           |

|                             |                                                     |                                                                                                                        |                                    |
|-----------------------------|-----------------------------------------------------|------------------------------------------------------------------------------------------------------------------------|------------------------------------|
| Kelly, M & Legg, D. (2009). | Complex programme: PRT, aerobic exercise and sports | n = 5<br>Measures per individual child in relation to "defined level of chance". No combined results. See Pages 12-15. | Plantar flexion                    |
|                             |                                                     |                                                                                                                        | Knee extension                     |
|                             |                                                     |                                                                                                                        | Hip extension                      |
|                             |                                                     |                                                                                                                        | overall interpretation of strength |

---

|                                                  |
|--------------------------------------------------|
| Energy efficiency index (EEI)                    |
| Canadian Occupational Performance Measure (COPM) |
| Satisfaction ratings                             |

| Intervention group      | Control group                 | Intervention effectiveness               |
|-------------------------|-------------------------------|------------------------------------------|
| <b>Boy</b>              | <b>Girl</b>                   | <b>Change</b>                            |
| Nonfunctional ambulator | Ambulated without limitations |                                          |
| 67%                     | 83%                           |                                          |
| 8; 10                   | 5; 9                          |                                          |
| 43; 65.0                | 33.9; 59.4                    | Boy; 51% increase. Girl: 76% increase.   |
| 698; 810                | 507; 550                      | Boy: 16% increase . Girl: 9% increase.   |
| 1.94; 2.70              | 2.2; 2.13                     | Boy: 39% increase. Girl: No improvement. |
| 120; 160                | 180; 180                      |                                          |
| 184; 184                | 179; 181                      |                                          |
| 1.17; 1.14              | 1.14; 1.22                    |                                          |
| NA; 10                  | NA; 7                         |                                          |

|                                                           |  |                                                                      |
|-----------------------------------------------------------|--|----------------------------------------------------------------------|
| <b>Minimal detectable change:<br/>See Table 2 p.1188.</b> |  |                                                                      |
| ± 0.18bpm                                                 |  | 0-14 weeks: 6/9 decreased; 14-26 weeks 3/7 increased, 0/7 decreased  |
| ± 11.7m/min                                               |  | 0-14 weeks: 6/9 increased. 0-26 weeks: not different                 |
| ± 3.0 kg                                                  |  | 0-14 weeks: 3/9 increased. 14-26 weeks: 1/7 decreased 0/7 increased. |
| ± 2.05 kg                                                 |  | 0-14: 7/9 increased. 14-12: 2 that improved decreased                |



|           |   |                                                                                       |
|-----------|---|---------------------------------------------------------------------------------------|
| ± 2.98 kg |   | 0-14: 7/9 increased, 1/9 decreased. 14-26: 4/6 that improved no change, 2/6 decreased |
| ± 1.21    |   | no changes                                                                            |
| ± 2.11    |   | 0-14: 6/9 improved GMFM-66 or BOTMP; 14-26: 4/6 that improved decreased to baseline   |
| ± 7.0     |   |                                                                                       |
| ± 8.5     |   |                                                                                       |
| 2 sec     |   | 0-14: 5/8. 14-26: all maintained                                                      |
| 30 sec    |   | 0-14 weeks: 4/4 improved. 14-26: 4/4 declined                                         |
|           | 5 | 0-14: 4/9 improved; 14-26: 2/4 that improved improved, 1 declined                     |
|           | 5 | 0-14: 4/5 improved; no further changes                                                |
|           | 3 | 0-14 weeks: 5/8 improved. 14-26: 2/6 decreased - both had improved                    |

|  |  |                                                                                         |
|--|--|-----------------------------------------------------------------------------------------|
|  |  | 4/6 children demonstrated increased strength beyond defined level of chance.            |
|  |  | Muscle strength outcomes were variable within and across children.                      |
|  |  | Muscle strength outcomes were variable within and across children.                      |
|  |  | 4/6 increased some strength parameter. All increased in at least 3/6 strength measures. |

|  |  |                                                                                            |
|--|--|--------------------------------------------------------------------------------------------|
|  |  | 6/6 demonstrated some improvements. 4/6 change beyond chance                               |
|  |  | Improvements noted for all (5) children.                                                   |
|  |  | Satisfaction scores ranged from 2-8 out of 10 at baseline and from 8-10 post-intervention. |
