# Supplementary material for: Systematic review of physical activity and exercise interventions to improve health, fitness and well-being of children and young people who use wheelchairs
Source: PubMed Central journal article supplement — BMJ Open Sport Exerc Med. 2016 Nov 15;2(1):e000109. doi: 10.1136/bmjsem-2016-000109 (PMC5125427; doi:10.1136/bmjsem-2016-000109), 2016-11-15
Supplement: bmjsem-2016-000109supp_search-log.pdf [file bmjsem-2016-000109supp_search-log.pdf]

## MEDLINE: Search log

# Query Limiters/Expanders Last Run Via Results S60 (S49 OR S50 OR S51 OR S52 OR S53 OR S54 OR S55 OR S56 OR S57) AND (S22 AND S48 AND S59) Search modes - Boolean/Phrase Interface - EBSCOhost  
Search Screen - Advanced Search  
Database - MEDLINE Display S59 S49 OR S50 OR S51 OR S52 OR S53 OR S54 OR S55 OR S56 OR S57 Search modes - Boolean/Phrase Interface - EBSCOhost  
Search Screen - Advanced Search  
Database - MEDLINE Display S58 (((S58 and S48 and S22) AND (S49 OR S50 OR S51 OR S52 OR S53 OR S55 OR S56 OR S57)) AND (S49 OR S50 OR S51 OR S52 OR S53 OR S54 OR S55 OR S56 OR S57)) AND (S49 OR S50 OR S51 OR S52 OR S53 OR S54 OR S55 OR S56 OR S57) Search modes - Boolean/Phrase Interface - EBSCOhost  
Search Screen - Advanced Search  
Database - MEDLINE Display S57 TI well-being AND AB well-being Search modes - Boolean/Phrase Interface - EBSCOhost  
Search Screen - Advanced Search  
Database - MEDLINE Display S56 TI wellbeing AND AB wellbeing Search modes - Boolean/Phrase Interface - EBSCOhost  
Search Screen - Advanced Search  
Database - MEDLINE Display S55 (MM "Exercise Therapy") Search modes - Boolean/Phrase Interface - EBSCOhost  
Search Screen - Advanced Search  
Database - MEDLINE Display S54 TI fitness AND AB fitness Search modes - Boolean/Phrase Interface - EBSCOhost  
Search Screen - Advanced Search  
Database - MEDLINE Display S53 TI exercis\* AND AB exercis\* Search modes - Boolean/Phrase Interface - EBSCOhost  
Search Screen - Advanced Search  
Database - MEDLINE Display S52 (MM "Health") Search modes - Boolean/Phrase Interface - EBSCOhost  
Search Screen - Advanced Search  
Database - MEDLINE Display S51 (MM "Motor Activity") Search modes - Boolean/Phrase Interface - EBSCOhost  
Search Screen - Advanced Search  
Database - MEDLINE Display S50 (MM "Physical Fitness") Search modes - Boolean/Phrase Interface - EBSCOhost  
Search Screen - Advanced Search  
Database - MEDLINE Display S49 (MH "Exercise") Search modes - Boolean/Phrase Interface - EBSCOhost  
Search Screen - Advanced Search  
Database - MEDLINE Display S48 (TI p#diatric\* AND AB p#diatric\*) AND (S23 OR S25 OR S27 OR S29 OR S30 OR S31 OR S32 OR S33 OR S35 OR S41 OR S42 OR S43 OR S44 OR S45 OR S46 OR S47) Search modes - Boolean/Phrase Interface - EBSCOhost  
Search Screen - Advanced Search  
Database - MEDLINE Display S47 TI p#diatric\* AND AB p#diatric\* Search modes - Boolean/Phrase Interface - EBSCOhost  
Search Screen - Advanced Search  
Database - MEDLINE Display S46 TI p#diatric\* AND AB p#diatric\* Search modes - Boolean/Phrase Interface - EBSCOhost  
Search Screen - Advanced Search  
Database - MEDLINE Display S45 TI child\* AND AB child\* Search modes - Boolean/Phrase Interface - EBSCOhost  
Search Screen - Advanced Search  
Database - MEDLINE Display S44 TI youth\* AND AB youth\* Search modes - Boolean/Phrase Interface - EBSCOhost  
Search Screen - Advanced Search  
Database - MEDLINE Display S43 TI youngster\* AND AB youngster\* Search modes - Boolean/Phrase Interface - EBSCOhost  
Search Screen - Advanced Search

Database - MEDLINE Display S42 TI young m#n\* AND AB young m#n\* Search modes - Boolean/Phrase Interface - EBSCOhost  
Search Screen - Advanced Search  
Database - MEDLINE Display S41 TI young wom#n\* AND AB young wom#n\* Search modes - Boolean/Phrase Interface - EBSCOhost  
Search Screen - Advanced Search  
Database - MEDLINE Display S40 TI young wom?n\* AND AB young wom?n\* Search modes - Boolean/Phrase Interface - EBSCOhost  
Search Screen - Advanced Search  
Database - MEDLINE Display S39 TI young wom\*n\* AND AB young wom\*n\* Search modes - Boolean/Phrase Interface - EBSCOhost  
Search Screen - Advanced Search  
Database - MEDLINE Display S38 TI young wom£n\* AND AB young wom£n\* Search modes - Boolean/Phrase Interface - EBSCOhost  
Search Screen - Advanced Search  
Database - MEDLINE Display S37 TI young wom£n\* AND AB young wom£n\* Search modes - Boolean/Phrase Interface - EBSCOhost  
Search Screen - Advanced Search  
Database - MEDLINE Display S36 TI young wom\$n\* AND AB young wom\$n\* Search modes - Boolean/Phrase Interface - EBSCOhost  
Search Screen - Advanced Search  
Database - MEDLINE Display S35 TI young patient\* AND AB young patient\* Search modes - Boolean/Phrase Interface - EBSCOhost  
Search Screen - Advanced Search  
Database - MEDLINE Display S34 TI young people AND AB young people Search modes - Boolean/Phrase Interface - EBSCOhost  
Search Screen - Advanced Search  
Database - MEDLINE Display S33 TI young people AND AB young people Search modes - Boolean/Phrase Interface - EBSCOhost  
Search Screen - Advanced Search  
Database - MEDLINE Display S32 TI young person AND AB young person Search modes - Boolean/Phrase Interface - EBSCOhost  
Search Screen - Advanced Search  
Database - MEDLINE Display S31 TI juvenile\* AND AB juvenile\* Search modes - Boolean/Phrase Interface - EBSCOhost  
Search Screen - Advanced Search  
Database - MEDLINE Display S30 TI teen\* AND AB teen\* Search modes - Boolean/Phrase Interface - EBSCOhost  
Search Screen - Advanced Search  
Database - MEDLINE Display S29 TI adolescen\* AND AB adolescen\* Search modes - Boolean/Phrase Interface - EBSCOhost  
Search Screen - Advanced Search  
Database - MEDLINE Display S28 TI adolescen\* AND AB adolescen\* Search modes - Boolean/Phrase Interface - EBSCOhost  
Search Screen - Advanced Search  
Database - MEDLINE Display S27 (MH "Pediatrics+") Search modes - SmartText Searching Interface - EBSCOhost  
Search Screen - Advanced Search  
Database - MEDLINE Display S26 (MH "Pediatrics+") Search modes - Boolean/Phrase Interface - EBSCOhost  
Search Screen - Advanced Search  
Database - MEDLINE Display S25 (MH "Child") Search modes - Boolean/Phrase Interface - EBSCOhost  
Search Screen - Advanced Search  
Database - MEDLINE Display S24 (MM "Disabled Children") Search modes - Boolean/Phrase Interface - EBSCOhost  
Search Screen - Advanced Search  
Database - MEDLINE Display S23 (MH "Adolescent") Search modes - Boolean/Phrase Interface - EBSCOhost  
Search Screen - Advanced Search

Database - MEDLINE Display S22 S2 OR S9 OR S10 OR S11 OR S12 OR S13 OR S16 OR S17 OR S18 OR S19 OR S21 Search modes - Boolean/Phrase Interface - EBSCOhost  
Search Screen - Advanced Search  
Database - MEDLINE Display S21 (TI impair\* AND AB impair\*) OR (S20) Search modes - Boolean/Phrase Interface - EBSCOhost  
Search Screen - Advanced Search  
Database - MEDLINE Display S20 TI impair\* AND AB impair\* Search modes - Boolean/Phrase Interface - EBSCOhost  
Search Screen - Advanced Search  
Database - MEDLINE Display S19 TI handicap\* AND AB handicap\* Search modes - Boolean/Phrase Interface - EBSCOhost  
Search Screen - Advanced Search  
Database - MEDLINE Display S18 TI wheelchair\* AND AB wheelchair\* Search modes - Boolean/Phrase Interface - EBSCOhost  
Search Screen - Advanced Search  
Database - MEDLINE Display S17 TI ampute\* AND AB ampute\* Search modes - Boolean/Phrase Interface - EBSCOhost  
Search Screen - Advanced Search  
Database - MEDLINE Display S16 TI disabl\* AND AB disabl\* Search modes - Boolean/Phrase Interface - EBSCOhost  
Search Screen - Advanced Search  
Database - MEDLINE Display S15 TI disabl\$ AND AB disabl\$ Search modes - Boolean/Phrase Interface - EBSCOhost  
Search Screen - Advanced Search  
Database - MEDLINE Display S14 TI disabl\$ Search modes - Boolean/Phrase Interface - EBSCOhost  
Search Screen - Advanced Search  
Database - MEDLINE Display S13 (MH "Spina Bifida Occulta") Search modes - Boolean/Phrase Interface - EBSCOhost  
Search Screen - Advanced Search  
Database - MEDLINE Display S12 (MH "Spina Bifida Cystica") Search modes - Boolean/Phrase Interface - EBSCOhost  
Search Screen - Advanced Search  
Database - MEDLINE Display S11 (MM "Amputees") Search modes - Boolean/Phrase Interface - EBSCOhost  
Search Screen - Advanced Search  
Database - MEDLINE Display S10 (MM "Wheelchairs") Search modes - Boolean/Phrase Interface - EBSCOhost  
Search Screen - Advanced Search  
Database - MEDLINE Display S9 (MH "Disabled Persons+") AND disability Search modes - SmartText Searching Interface - EBSCOhost  
Search Screen - Advanced Search  
Database - MEDLINE Display S8 (MH "Disabled Persons+") AND disability Search modes - Boolean/Phrase Interface - EBSCOhost  
Search Screen - Advanced Search  
Database - MEDLINE Display S7 (MH "Disabled Persons+") AND disability Search modes - Boolean/Phrase Interface - EBSCOhost  
Search Screen - Advanced Search  
Database - MEDLINE Display S6 (MH "Disabled Persons+") AND disability Search modes - SmartText Searching Interface - EBSCOhost  
Search Screen - Advanced Search  
Database - MEDLINE Display S5 (MH "Disabled Persons+") AND disability Search modes - Boolean/Phrase Interface - EBSCOhost  
Search Screen - Advanced Search  
Database - MEDLINE Display S4 (MH "Disabled Persons+") Search modes - SmartText Searching Interface - EBSCOhost  
Search Screen - Advanced Search  
Database - MEDLINE Display S3 (MH "Disabled Persons+") Search modes - Boolean/Phrase Interface - EBSCOhost  
Search Screen - Advanced Search

Database - MEDLINE Display S2 (MM "Adolescent") Search modes - Boolean/Phrase  
Interface - EBSCOhost

Search Screen - Advanced Search

Database - MEDLINE Display S1 (MM "Disabled Children") Search modes - Boolean/Phrase  
Interface - EBSCOhost

Search Screen - Advanced Search

Database - MEDLINE
